# Supplementary material for: A designed and potentially decadentate ligand for use in lanthanide(iii) catalysed biomass transformations: targeting diastereoselectivetrans-4,5-diaminocyclopentenone derivatives
Source: Royal Society of Chemistry journal article supplement (doi:10.1039/d0dt00183j), 2020-01-01
Supplement: d0dt00183j1.pdf [file d0dt00183j1.pdf]

## Supporting Information

### A designed and potentially decadentate ligand for use in lanthanide(III) catalysed biomass transformations: Targeting diastereoselective *trans*-4,5-diaminocyclopentenone derivatives.

Krisana Peewasan,<sup>\* a</sup> Marcel P. Merkel,<sup>b</sup> Olaf Fuhr<sup>b,c</sup> and Annie K. Powell<sup>\* a,b</sup>

|                                                                                                                                                                     |    |
|---------------------------------------------------------------------------------------------------------------------------------------------------------------------|----|
| 1. General consideration .....                                                                                                                                      | 2  |
| 2. Preparation of <i>N,N'</i> -dimethyl- <i>N,N'</i> -ethylene-bis(5-bromo-3-(1H-benzimidazol-2-yl)hydrazineylidene)-2-hydroxybenzylamine) (LH <sub>6</sub> ) ..... | 2  |
| 3. Preparation of single lanthanide complexes .....                                                                                                                 | 5  |
| 4. Catalytic properties study .....                                                                                                                                 | 23 |
| 5. Crystal structural data .....                                                                                                                                    | 37 |
| 6. SHAPE analysis .....                                                                                                                                             | 39 |

**General considerations.** All reagents and solvents were used as received from commercial supplies without further purification. To determine the carbon, hydrogen, nitrogen and sulfur fractions of the samples, elemental analysis was carried out using a "Vario Micro Cube" device from Perkin Elmer. Infrared spectra were recorded on a Perkin Elmer Spectrum GX FT-IR spectrometer as KBr pellets in the range 400 cm<sup>-1</sup> to 4000 cm<sup>-1</sup> with a resolution of 8 cm<sup>-1</sup>. The following abbreviations were used to describe the peak characteristics: br = broad, sh = shoulder, s = strong, m = medium and w = weak. NMR spectra of the compounds were measured using a Bruker Ultrashield plus 500 (500 MHz) and Varian 500 MHz spectrometer. <sup>1</sup>H- and <sup>13</sup>C-measurements were recorded using deuterated solvents and referenced to tetramethylsilane (TMS) as an internal standard ( $\delta = 0$  ppm). The structures were measured using single crystal X-ray diffraction (SCXRD) on area detector diffractometers: STADIVARI (Mo-K $\alpha$ ,  $\lambda = 0.71073$  Å; Cu-K $\alpha$ ,  $\lambda = 1.5405$  Å, detector: Dectris Pilatus 300K (detector: CMOS)) and STADIVARI (Ga-K $\alpha$ ,  $\lambda = 1.34143$  Å, detector: Dectris Eiger2 R 4M (detector type: HPC)) (STOE). The measurements were taken at temperatures of 150 K and 180 K. The crystals were attached to the goniometer head with perfluoroether oil. Powder X-ray diffraction (PXRD) measurements were performed on an STOE STADI-P diffractometer with Cu-K $\alpha$  radiation.

**Preparation of *N,N'*-dimethyl-*N,N'*-ethylene-bis(5-bromo-3-(1H-benzimidazol-2-yl)hydrazineylidene)-2-hydroxybenzylamine) (LH<sub>6</sub>)**

Synthesis of the ligand LH<sub>6</sub> was performed by the condensation reaction between *N,N'*-dimethyl-*N,N'*-ethylene-di(5-bromo-3-formyl-2-hydroxybenzylamine) (**1**) and 2-Hydrazino-1H-1,3-benzimidazole (**2**) under reflux in absolute ethanol for 2 hours. After completion of the reaction, yellow solid was filtered, washed with cooled ethanol and dried under reduced pressure.

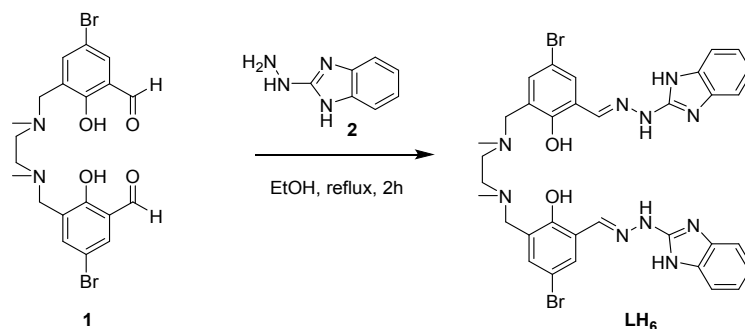

**Scheme1.** Preparation of Schiff-base ligand LH<sub>6</sub>.

## Synthesis: LH<sub>6</sub>

*N,N'*-dimethyl-*N,N'*-ethylene-di(5-bromo-3-formyl-2-hydroxybenzylamine) (**1**) (10.91 mmol, 1.650 g) and 2-Hydrazino-1H-1,3-benzimidazole (**2**) (8.71 mmol, 1.326 g) were dissolved in absolute EtOH (100 mL). The resulting mixture was refluxed 2h. After completion of the reaction, the yellow solid was filtered, washed with cooled ethanol and dried under reduced pressure to obtain (93% yield). <sup>1</sup>H NMR (500 MHz, DMSO-d<sub>6</sub>) = δ 11.60 (s, 4 H), 8.32 (s, 2H), 8.02 (d, J = 2.6 Hz, 2H), 7.29 (d, J = 2.6, Hz, 2H), 7.24 (t, J = 8.0 Hz, 4H), 7.01-6.95 (m, 4H), 3.74 (s, 4H), 2.66 (s, 4H), 2.23 (s, 6H). <sup>13</sup>C NMR (126 MHz, DMSO-d<sub>6</sub>) = δ 154.6 (CH), 151.81 (C), 148.03 (C), 154.6 (C), 153.4 (C), 131.0 (C), 126.8 (CH), 125.7 (CH), 123.0 (CH), 120.4 (CH), 110.2 (2×CH), 109.0 (CH), 27.8 (CH<sub>2</sub>), 52.9 (CH<sub>2</sub>), 40.6 (CH<sub>2</sub>), KBr: 3443s, 2812s, 1650s, 1609m, 1572m, 1514s, 1459s, 1341w, 1268m, 1145m, 1021m, 741s, 491m.

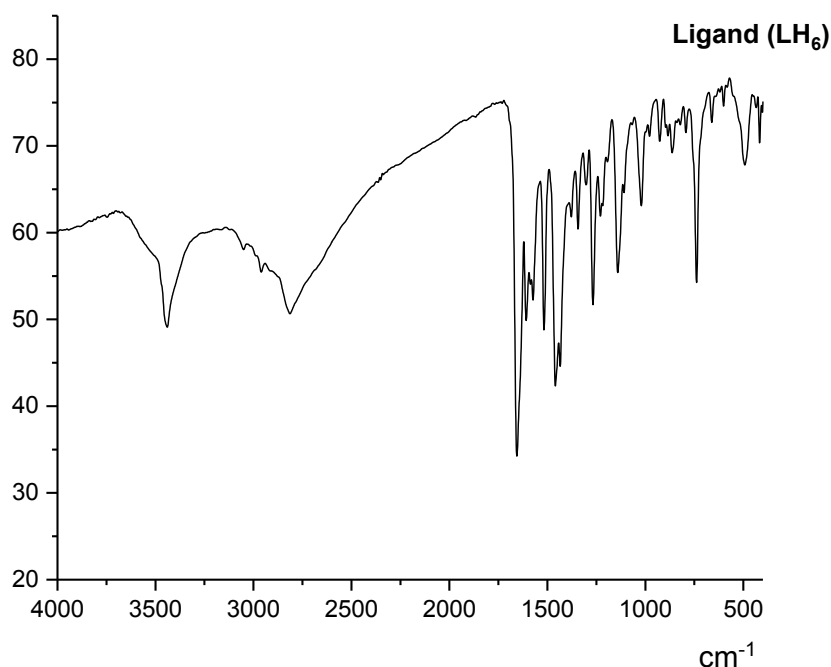

**Figure S1.** IR spectra of Schiff-base LH<sub>6</sub> in KBr pallet.

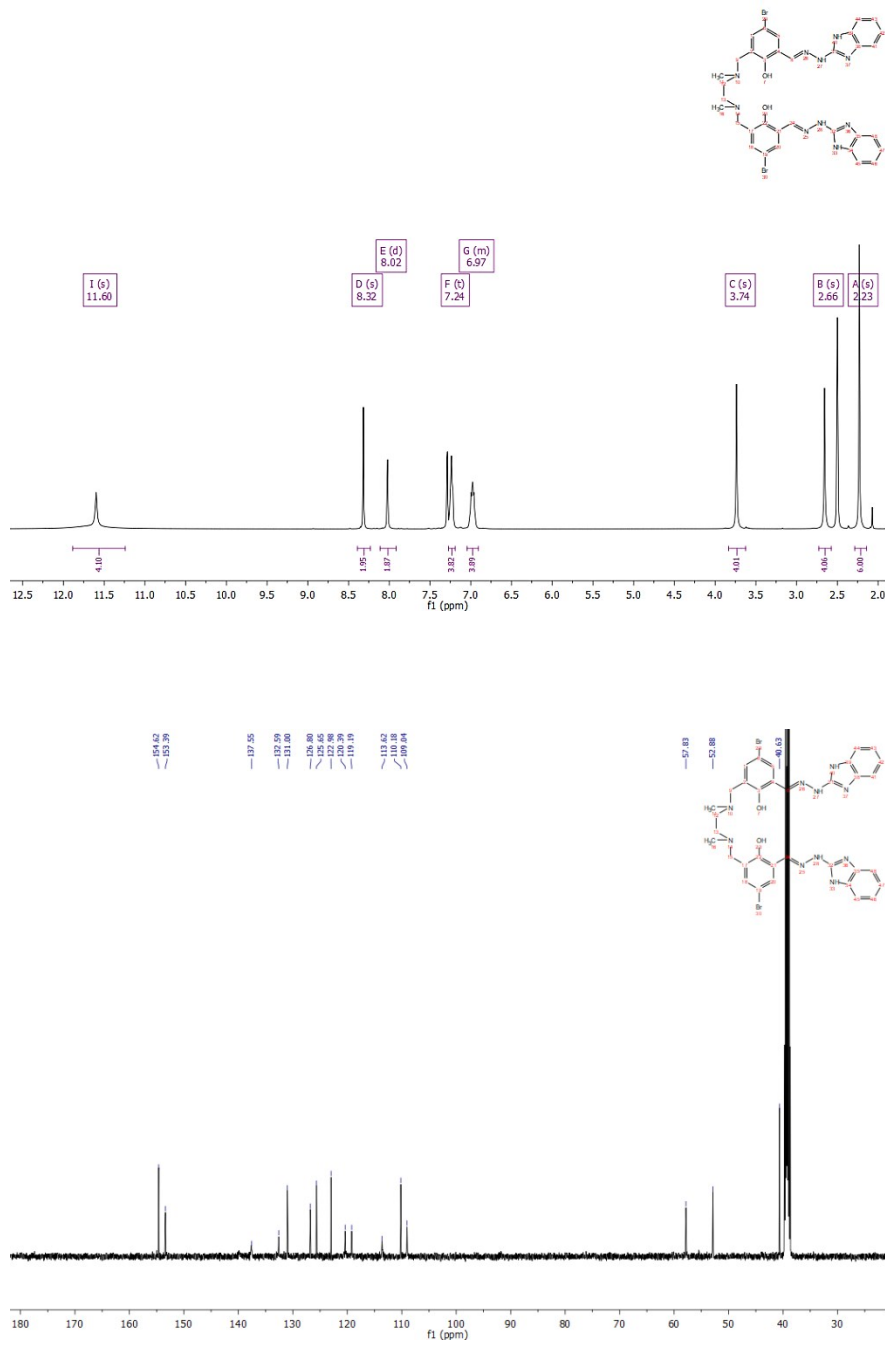

FigureS2. NMR spectra of Schiff-base LH<sub>6</sub>.

### Preparation of single lanthanide complexes

**General procedure:** A solution of the Schiff-base ligand **LH<sub>6</sub>** (0.1 mmol, 77.4 mg) in methanol (10 mL) was added a solution of Ln(III) (0.1 mmol) in 1:1 acetonitrile-methanol (10 mL). The resulting mixture was stirred at room temperature for 1 h. After being filtrated the pale yellow solution was left to stand at ambient temperature to allow for solvent evaporation. After 7 days, well-shaped crystals of the complex were observed. The product could be obtained in the form of powder in higher yield by extensive stirring and extending the reaction time up to 2h.

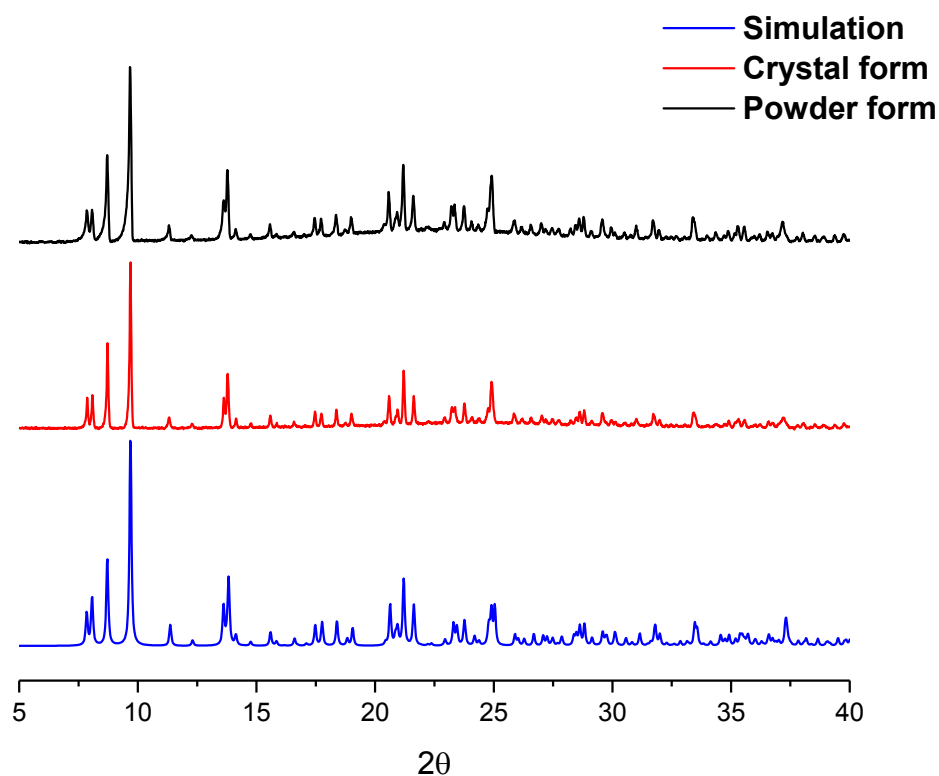

**Figure S3.** PXRD of measured **C<sub>34</sub>H<sub>34</sub>Br<sub>2</sub>DyN<sub>13</sub>O<sub>11</sub>** Crystal and powder form compare to simulation of **C<sub>34</sub>H<sub>34</sub>Br<sub>2</sub>SmN<sub>13</sub>O<sub>11</sub>**

a)

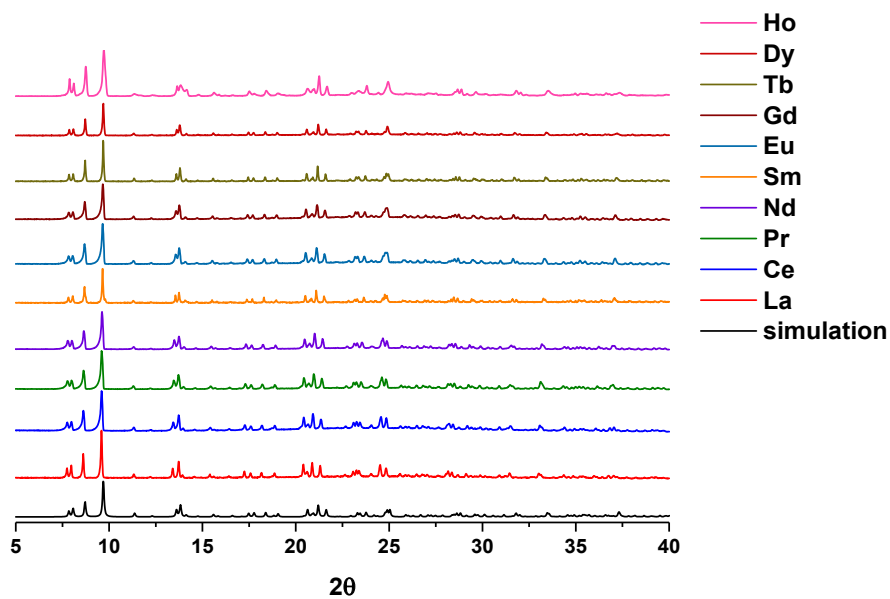

b)

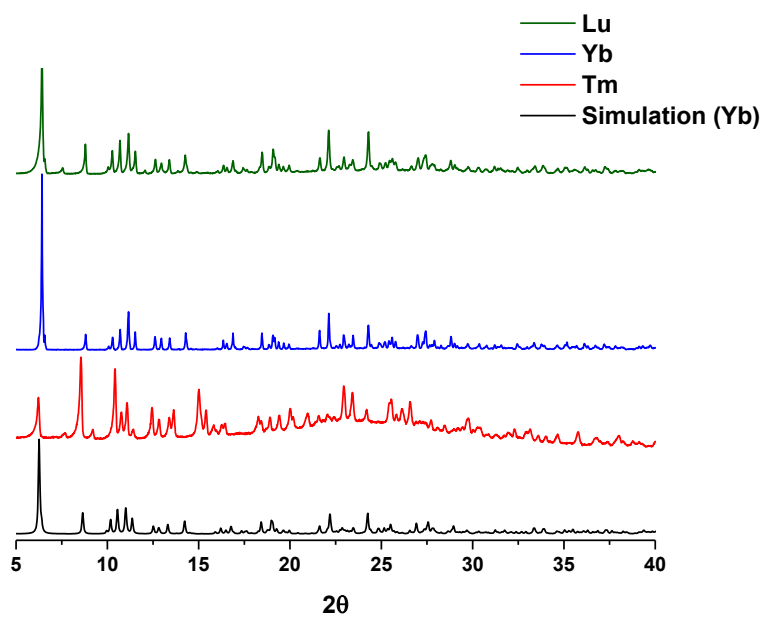

**Figure S4.** PXRD of measured **Ln(III)LH<sub>6</sub>** and simulation, a) 10-fold coordination and b) 8-fold coordination.

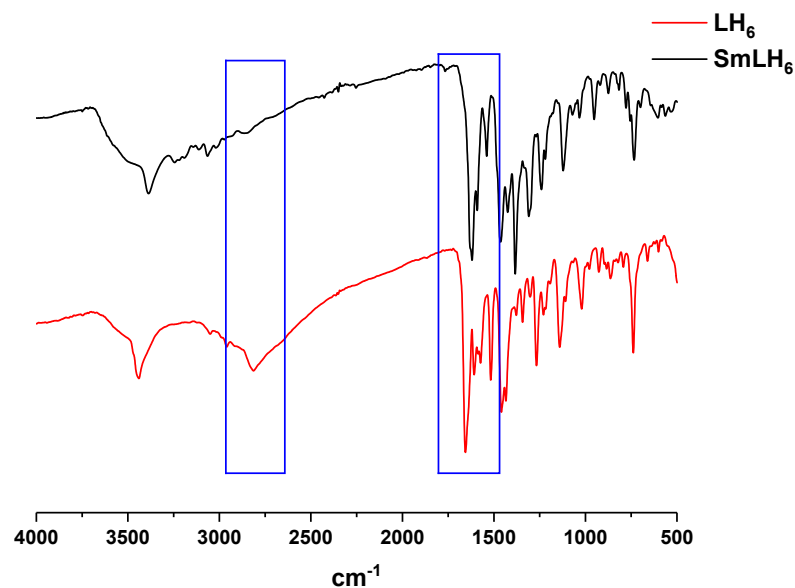

**Figure S5.** Comparison of IR spectra of Schiff-base **LH<sub>6</sub>** and **SmLH<sub>6</sub>** in KBr pallet.

**C<sub>34</sub>H<sub>34</sub>Br<sub>2</sub>LaN<sub>13</sub>O<sub>11</sub>**; Yield 72% (based on La(NO<sub>3</sub>)<sub>2</sub>•6H<sub>2</sub>O). Elemental analysis calcd for (**C<sub>34</sub>H<sub>34</sub>Br<sub>2</sub>LaN<sub>13</sub>O<sub>11</sub>**): C, 37.14%; H, 3.12%; N, 16.65%. Found: C, 36.98%; H, 3.22%; N, 16.68%. FT-IR (cm<sup>-1</sup>) KBr: 3379m, 3240w, 3062w, 1612s, 1591s, 1537m, 1462s, 1424s, 1386s, 1301s, 1238s, 1216m, 1118m, 1068w, 1033w, 947w, 872w, 736m.

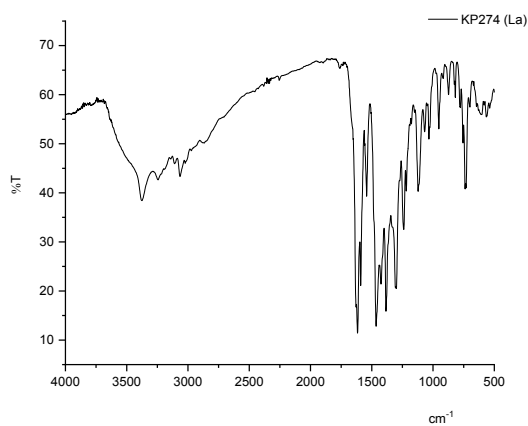

**Figure S6.** IR spectra of **C<sub>34</sub>H<sub>34</sub>Br<sub>2</sub>LaN<sub>13</sub>O<sub>11</sub>** in KBr pallet.

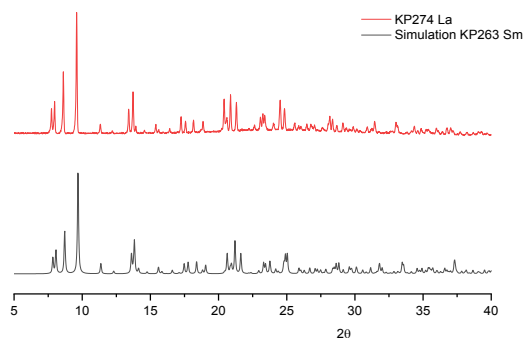

**Figure S7.** PXRD of measured  $\text{C}_{34}\text{H}_{34}\text{Br}_2\text{GdN}_{13}\text{O}_{11}$  and simulated  $\text{C}_{34}\text{H}_{34}\text{Br}_2\text{SmN}_{13}\text{O}_{11}$

$\text{C}_{34}\text{H}_{34}\text{Br}_2\text{CeN}_{13}\text{O}_{11}$ ; Yield 83% (based on  $\text{La}(\text{NO}_3)_2 \cdot 6\text{H}_2\text{O}$ ). Elemental analysis calcd for  $(\text{C}_{34}\text{H}_{34}\text{Br}_2\text{LaN}_{13}\text{O}_{11} \cdot \text{H}_2\text{O})$ : C, 36.51%; H, 3.24%; N, 16.28%. Found: C, 36.43%; H, 3.30%; N, 16.51%. FT-IR ( $\text{cm}^{-1}$ ) KBr: 3414s, 3062w, 2962w, 1615s, 1594m, 1541w, 1461s, 1425m, 1382s, 1295m, 1243m, 1120m, 1034w, 954w, 874w, 815w, 732w.

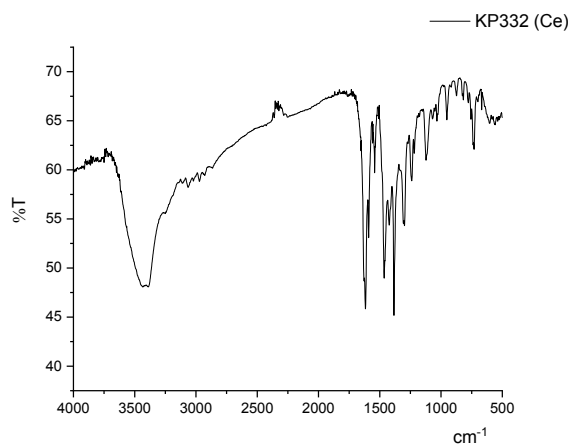

**Figure S8.** IR spectra of  $\text{C}_{34}\text{H}_{34}\text{Br}_2\text{CeN}_{13}\text{O}_{11}$  in KBr pallet.



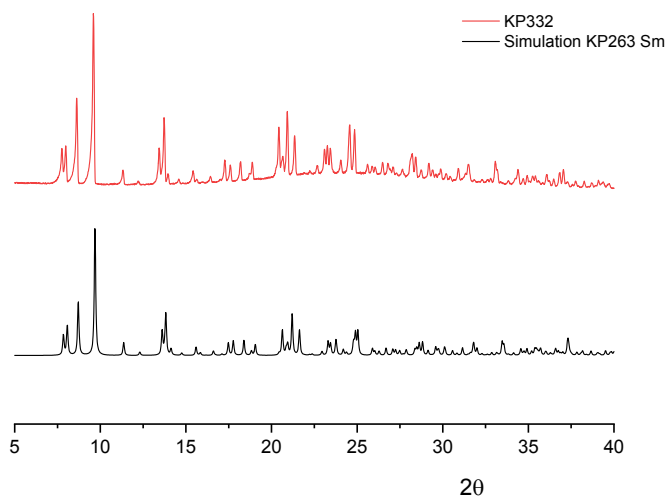

**Figure S9.** PXRD of measured  $C_{34}H_{34}Br_2CeN_{13}O_{11}$  and simulated  $C_{34}H_{34}Br_2SmN_{13}O_{11}$

$C_{34}H_{34}Br_2PrN_{13}O_{11}$ ; Yield 83% (based on  $Pr(NO_3)_2 \cdot 6H_2O$ ). Elemental analysis calcd for  $(C_{34}H_{34}Br_2PrN_{13}O_{11} \cdot H_2O)$ : C, 36.48%; H, 3.24%; N, 16.27%. Found: C, 36.56%; H, 3.26%; N, 16.50%. FT-IR ( $cm^{-1}$ ) KBr: 3389m, 3245w, 3067w, 1616s, 1587m, 1543w, 1465s, 1420s, 1388s, 1236s, 1218w, 1122m, 1069w, 1034w, 950w, 876w, 816w, 779w, 729m.

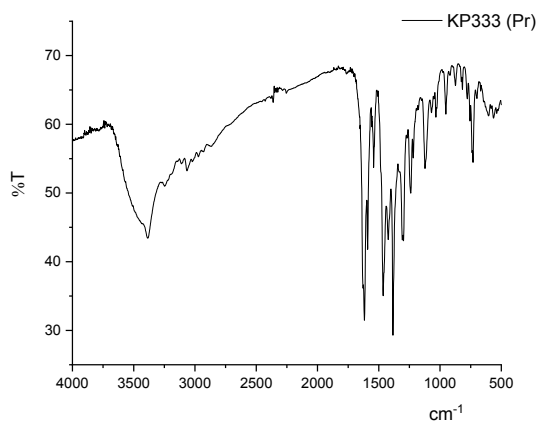

**Figure S10.** IR spectra of  $C_{34}H_{34}Br_2PrN_{13}O_{11}$  in KBr pallet.

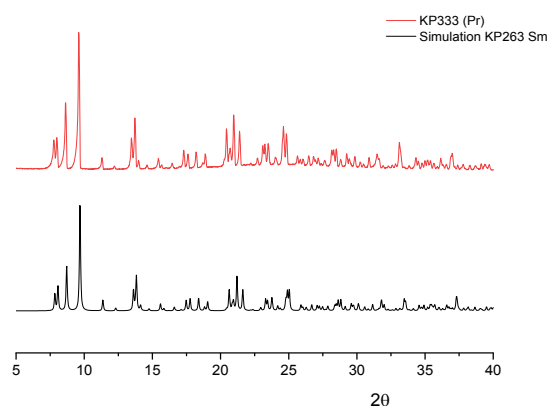

**Figure S11.** PXRD of measured  $\text{C}_{34}\text{H}_{34}\text{Br}_2\text{PrN}_{13}\text{O}_{11}$  and simulated  $\text{C}_{34}\text{H}_{34}\text{Br}_2\text{SmN}_{13}\text{O}_{11}$

$\text{C}_{34}\text{H}_{34}\text{Br}_2\text{NdN}_{13}\text{O}_{11}$ ; Yield 78% (based on  $\text{Nd}(\text{NO}_3)_2 \cdot 5\text{H}_2\text{O}$ ). Elemental analysis calcd for  $(\text{C}_{34}\text{H}_{34}\text{Br}_2\text{NdN}_{13}\text{O}_{11} \cdot \text{H}_2\text{O})$ : C, 36.96%; H, 3.10%; N, 16.48%. Found: C, 36.59%; H, 3.30%; N, 16.58%. FT-IR ( $\text{cm}^{-1}$ ) KBr: 3389s, 3051w, 1620s, 1538m, 1464s, 1423s, 1382s, 1301s, 1239m, 1127m, 1071w, 1035w, 954w, 871w, 815w, 733m.

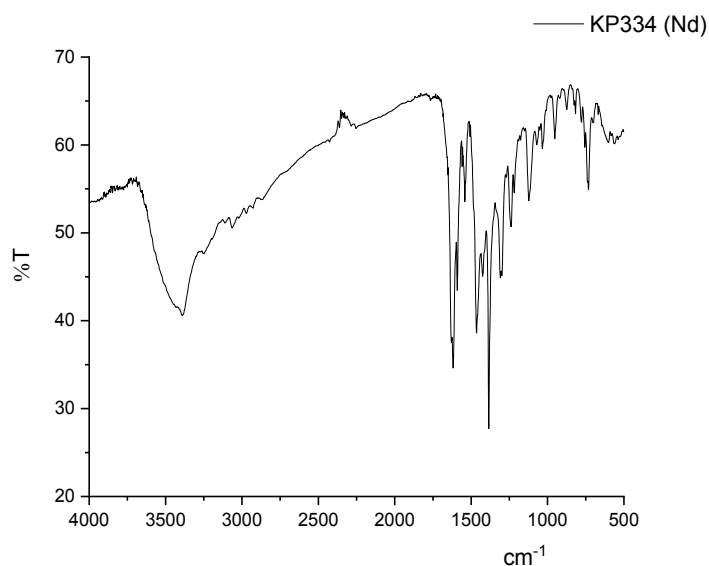

**Figure S12.** IR spectra of  $\text{C}_{34}\text{H}_{34}\text{Br}_2\text{NdN}_{13}\text{O}_{11}$  in KBr pallet.

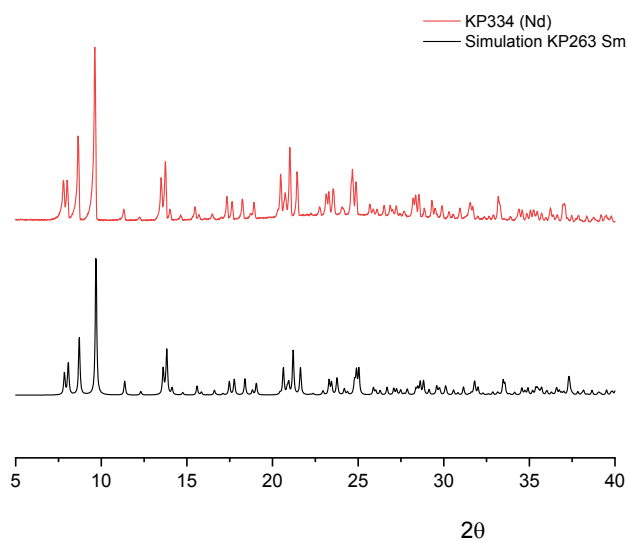

**Figure S13.** PXRD of measured  $\text{C}_{34}\text{H}_{34}\text{Br}_2\text{NdN}_{13}\text{O}_{11}$  and simulated  $\text{C}_{34}\text{H}_{34}\text{Br}_2\text{SmN}_{13}\text{O}_{11}$

$\text{C}_{34}\text{H}_{34}\text{Br}_2\text{SmN}_{13}\text{O}_{11}$ ; Yield 79% (based on  $\text{Sm}(\text{NO}_3)_2 \cdot 5\text{H}_2\text{O}$ ). Elemental analysis calcd for  $(\text{C}_{34}\text{H}_{34}\text{Br}_2\text{SmN}_{13}\text{O}_{11} \cdot \text{H}_2\text{O})$ : C, 36.16%; H, 3.21%; N, 16.13%. Found: C, 36.05%; H, 3.23%; N, 16.18%. FT-IR ( $\text{cm}^{-1}$ ) KBr: 3391m, 1616s, 1592s, 1543m, 1460s, 1420s, 1383s, 1307s, 1241s, 1121s, 1028w, 1031w, 954w, 873w, 816w, 735m.

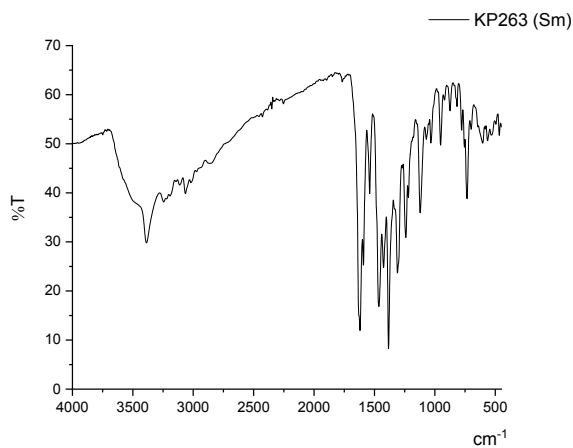

**Figure S14.** IR spectra of  $\text{C}_{34}\text{H}_{34}\text{Br}_2\text{SmN}_{13}\text{O}_{11}$  in KBr pallet.

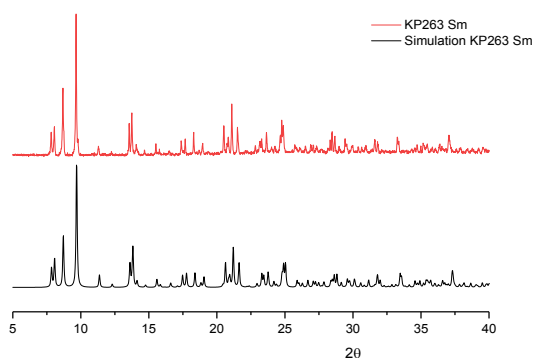

**Figure S15.** PXRD of measured  $C_{34}H_{34}Br_2SmN_{13}O_{11}$  and simulated  $C_{34}H_{34}Br_2SmN_{13}O_{11}$

$C_{34}H_{34}Br_2EuN_{13}O_{11}$ ; Yield 82% (based on  $Eu(NO_3)_2 \cdot 5H_2O$ ). Elemental analysis calcd for  $(C_{34}H_{34}Br_2EuN_{13}O_{11} \cdot H_2O)$ : C, 36.12%; H, 3.21%; N, 16.11%. Found: C, 36.12%; H, 3.29%; N, 16.23%. FT-IR ( $cm^{-1}$ ) KBr: 3359s, 1622m, 1592s, 1542m, 1426m, 1380s, 1306s, 1239s, 1121s, 1071w, 1031w, 953w, 874w, 814w, 780w, 736m.

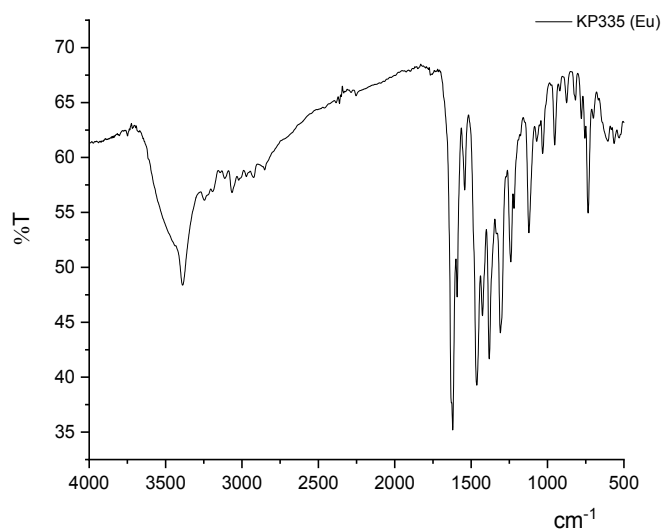

**Figure S16.** IR spectra of  $C_{34}H_{34}Br_2EuN_{13}O_{11}$  in KBr pallet.

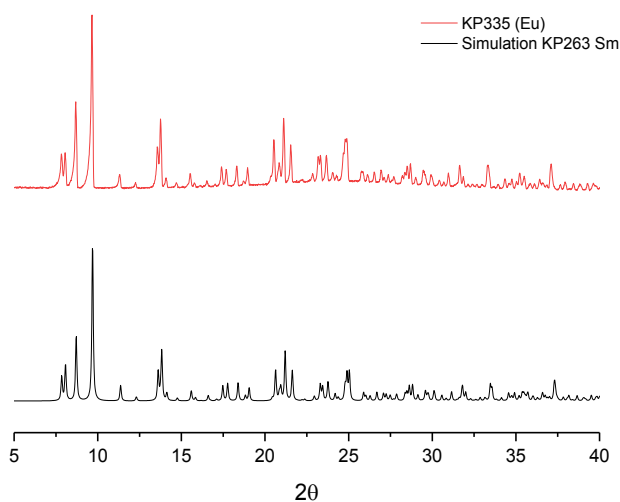

**Figure S17.** PXRD of measured  $\text{C}_{34}\text{H}_{34}\text{Br}_2\text{EuN}_{13}\text{O}_{11}$  and simulated  $\text{C}_{34}\text{H}_{34}\text{Br}_2\text{SmN}_{13}\text{O}_{11}$

$\text{C}_{34}\text{H}_{34}\text{Br}_2\text{GdN}_{13}\text{O}_{11}$ ; Yield 86% (based on  $\text{Gd}(\text{NO}_3)_2 \cdot 6\text{H}_2\text{O}$ ). Elemental analysis calcd for  $(\text{C}_{34}\text{H}_{34}\text{Br}_2\text{GdN}_{13}\text{O}_{11} \cdot \text{H}_2\text{O})$ : C, 35.95%; H, 3.19%; N, 16.03%. Found: C, 36.05%; H, 3.24%; N, 16.21%. FT-IR ( $\text{cm}^{-1}$ ) KBr: 3391m, 1623s, 1588s, 1540m, 1463s, 1425s, 1380s, 1306s, 1238s, 1119s, 1028m, 956w, 734m.

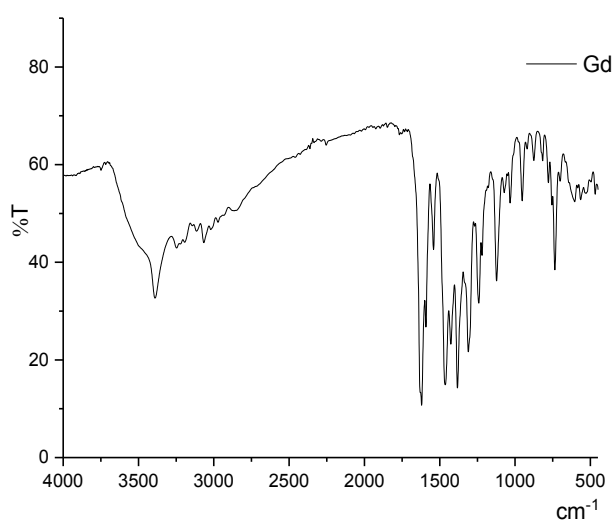

**Figure S18.** IR spectra of  $\text{C}_{34}\text{H}_{34}\text{Br}_2\text{GdN}_{13}\text{O}_{11}$  in KBr pallet.

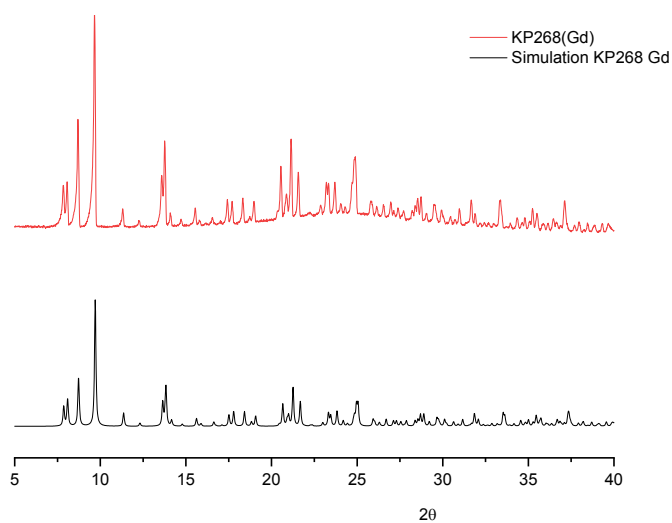

**Figure S19.** PXRD of measured  $\text{C}_{34}\text{H}_{34}\text{Br}_2\text{GdN}_{13}\text{O}_{11}$  and simulated  $\text{C}_{34}\text{H}_{34}\text{Br}_2\text{GdN}_{13}\text{O}_{11}$

$\text{C}_{34}\text{H}_{34}\text{Br}_2\text{TbN}_{13}\text{O}_{11}$ ; Yield 75% (based on  $\text{Tb}(\text{NO}_3)_2 \cdot 5\text{H}_2\text{O}$ ). Elemental analysis calcd for  $(\text{C}_{34}\text{H}_{34}\text{Br}_2\text{TbN}_{13}\text{O}_{11} \cdot \text{H}_2\text{O})$ : C, 35.90%; H, 3.19%; N, 16.01%. Found: C, 35.82%; H, 3.20%; N, 16.15%. FT-IR ( $\text{cm}^{-1}$ ) KBr: 3391s, 1621s, 1589m, 1543m, 1466s, 1427m, 1379s, 1308s, 1241m, 1218m, 1118m, 1028w, 1030w, 948w, 847w, 816w, 732m.

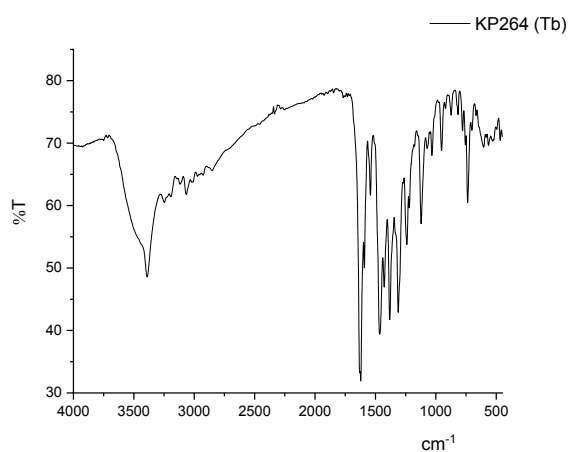

**Figure S20.** IR spectra of  $\text{C}_{34}\text{H}_{34}\text{Br}_2\text{TbN}_{13}\text{O}_{11}$  in KBr pallet.

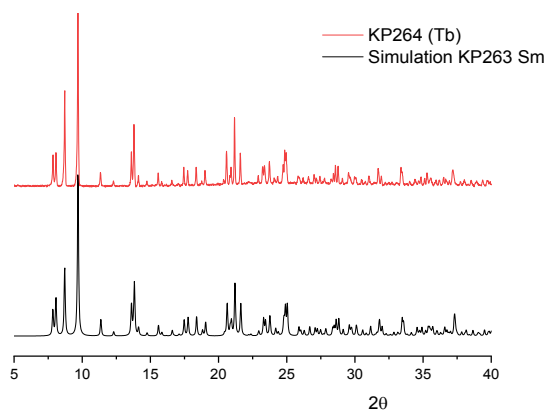

**Figure S21.** PXRD of measured  $\text{C}_{34}\text{H}_{34}\text{Br}_2\text{TbN}_{13}\text{O}_{11}$  and simulated  $\text{C}_{34}\text{H}_{34}\text{Br}_2\text{SmN}_{13}\text{O}_{11}$

$\text{C}_{34}\text{H}_{34}\text{Br}_2\text{DyN}_{13}\text{O}_{11}$ ; Yield 79% (based on  $\text{Dy}(\text{NO}_3)_2 \cdot 5\text{H}_2\text{O}$ ). Elemental analysis calcd for  $(\text{C}_{34}\text{H}_{34}\text{Br}_2\text{DyN}_{13}\text{O}_{11} \cdot \text{H}_2\text{O})$ : C, 35.79%; H, 3.18%; N, 15.96%. Found: C, 35.61%; H, 3.16%; N, 15.91%. FT-IR ( $\text{cm}^{-1}$ ) KBr: 3389m, 1627s, 1537m, 1468s, 1428s, 1381s, 1309s, 1244s, 1125s, 1028w, 953w, 872w, 735m.

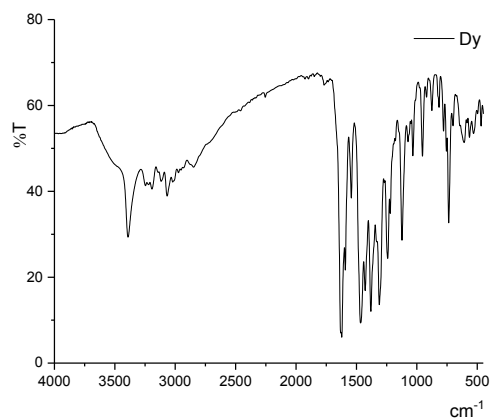

**Figure S22.** IR spectra of  $\text{C}_{34}\text{H}_{34}\text{Br}_2\text{DyN}_{13}\text{O}_{11}$  in KBr pallet.

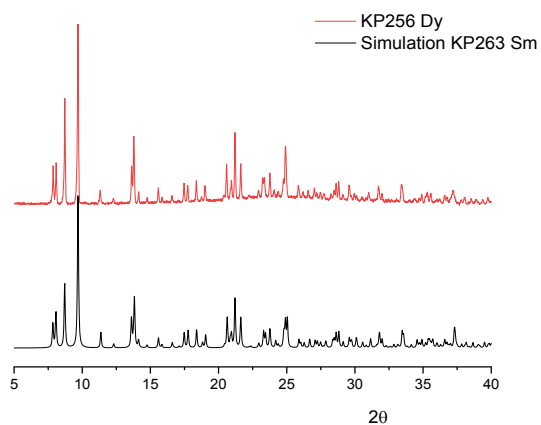

**Figure S23.** PXRD of measured  $\text{C}_{34}\text{H}_{34}\text{Br}_2\text{DyN}_{13}\text{O}_{11}$  and simulated  $\text{C}_{34}\text{H}_{34}\text{Br}_2\text{SmN}_{13}\text{O}_{11}$

$\text{C}_{34}\text{H}_{34}\text{Br}_2\text{HoN}_{13}\text{O}_{11}$ ; Yield 84% (based on  $\text{Ho}(\text{NO}_3)_2 \cdot 5\text{H}_2\text{O}$ ). Elemental analysis calcd for  $(\text{C}_{34}\text{H}_{34}\text{Br}_2\text{HoN}_{13}\text{O}_{11} \cdot \text{H}_2\text{O})$ : C, 35.71%; H, 3.17%; N, 15.92%. Found: C, 35.32%; H, 3.08%; N, 16.02%. FT-IR ( $\text{cm}^{-1}$ ) KBr: 3435s, 1621s, 1589m, 1545w, 1456s, 1380m, 1298s, 1246m, 1227m, 1072w, 1029w, 1028w, 941w, 847w, 822w, 816w, 736m.

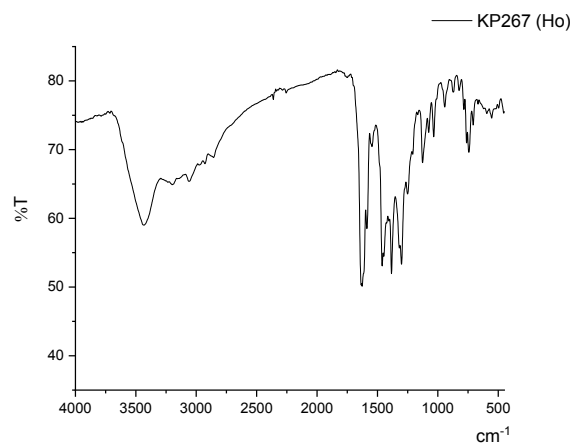

**Figure S24.** IR spectra of  $C_{34}H_{34}Br_2HoN_{13}O_{11}$  in KBr pallet.

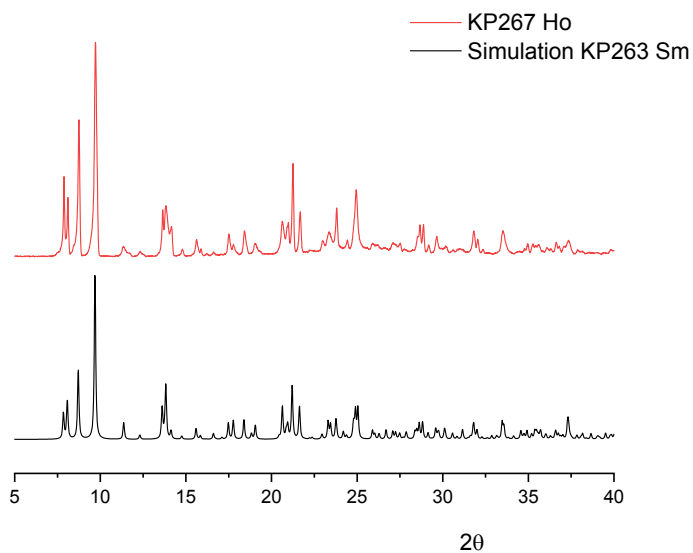

**Figure S25.** PXRD of measured  $C_{34}H_{34}Br_2HoN_{13}O_{11}$  and simulated  $C_{34}H_{34}Br_2SmN_{13}O_{11}$

$C_{34}H_{34}Br_2ErN_{13}O_{11}$ ; Yield 80% (based on  $Er(NO_3)_2 \cdot 5H_2O$ ). Elemental analysis calcd for ( $C_{34}H_{34}Br_2YbN_{13}O_{11}$ ): C, 36.21%; H, 3.04%; N, 16.15%. Found: C, 35.61%; H, 3.16%; N, 15.91%. FT-IR ( $cm^{-1}$ ) KBr: 3414s, 1617s, 1463s, 1384s, 1319s, 1241w, 1154w, 1120w, 1077w, 1035w, 948w, 812w, 744w.



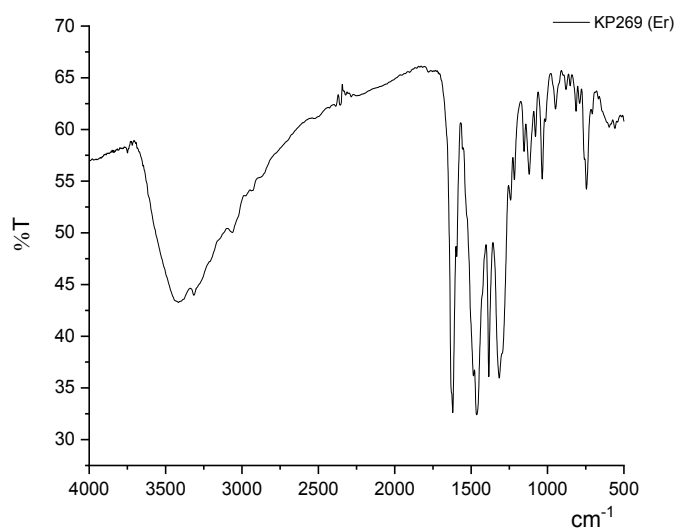

**Figure S26.** IR spectra of  $\text{C}_{34}\text{H}_{34}\text{Br}_2\text{ErN}_{13}\text{O}_{11}$  in KBr pallet.

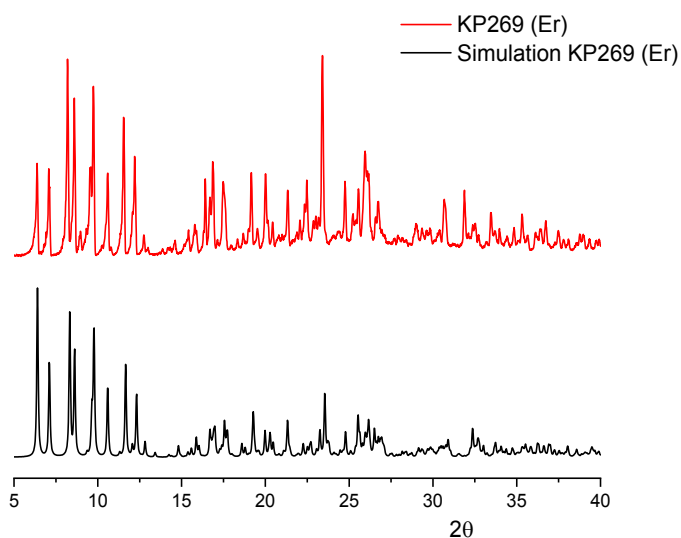

**Figure S27.** PXRD of measured  $\text{C}_{34}\text{H}_{34}\text{Br}_2\text{ErN}_{13}\text{O}_{11}$  and simulated  $\text{C}_{34}\text{H}_{34}\text{Br}_2\text{ErN}_{13}\text{O}_{11}$

$\text{C}_{34}\text{H}_{34}\text{Br}_2\text{TmN}_{13}\text{O}_{11}$ ; Yield 82% (based on  $\text{Tm}(\text{NO}_3)_2 \cdot 5\text{H}_2\text{O}$ ). Elemental analysis calcd for  $(\text{C}_{34}\text{H}_{34}\text{Br}_2\text{TmN}_{13}\text{O}_{11} \cdot \text{H}_2\text{O})$ : C, 35.59%; H, 3.16%; N, 15.87%. Found: C, 35.02%; H, 3.34%; N,

15.82%. FT-IR ( $\text{cm}^{-1}$ ) KBr: 3436s, 1639s, 1447s, 1381s, 1300s, 1248m, 1226m, 1077w, 1032w, 942w, 868w, 826w, 760w, 745w.

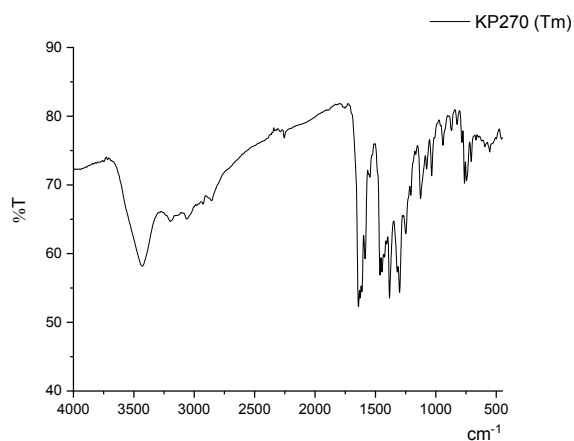

**Figure S28.** IR spectra of  $\text{C}_{34}\text{H}_{34}\text{Br}_2\text{TmN}_{13}\text{O}_{11}$  in KBr pallet.

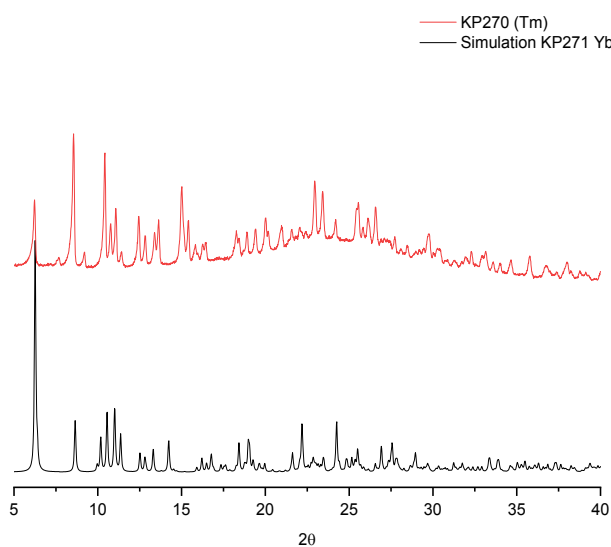

**Figure S29.** PXRD of measured  $\text{C}_{34}\text{H}_{34}\text{Br}_2\text{TmN}_{13}\text{O}_{11}$  and simulated  $\text{C}_{34}\text{H}_{34}\text{Br}_2\text{SmN}_{13}\text{O}_{11}$

$\text{C}_{40}\text{H}_{43}\text{Br}_2\text{YbN}_{16}\text{O}_{11}$ ; Yield 69% (based on  $\text{Yb}(\text{NO}_3)_2 \cdot 5\text{H}_2\text{O}$ ). Elemental analysis calcd for  $(\text{C}_{34}\text{H}_{34}\text{Br}_2\text{YbN}_{13}\text{O}_{11} \cdot 3\text{H}_2\text{O})$ : C, 34.39%; H, 3.39%; N, 15.33%. Found: C, 34.14%; H, 3.61%; N, 15.75%. FT-IR ( $\text{cm}^{-1}$ ) KBr: 3436s, 1614s, 1591s, 1533w, 1487m, 1451s, 1382s, 1321m, 1295m, 1250m, 1116w, 1073w, 1030w, 945w, 881w, 824w, 738m.

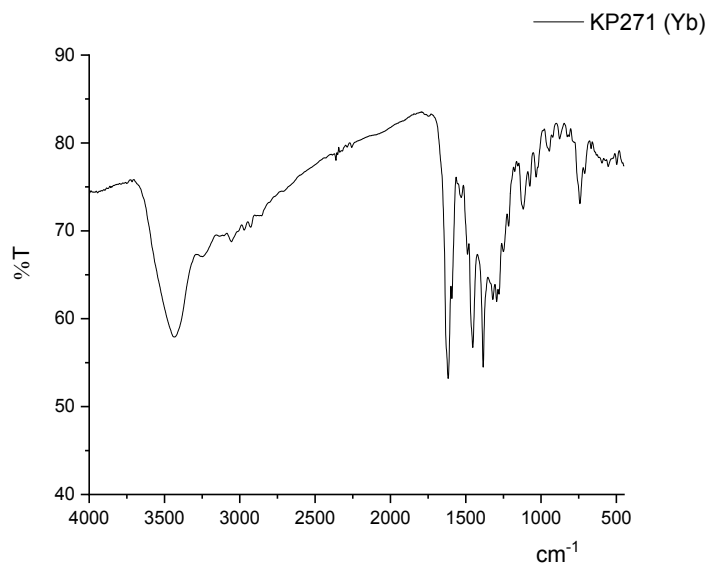

**Figure S30** IR spectra of  $\text{C}_{34}\text{H}_{34}\text{Br}_2\text{YbN}_{13}\text{O}_{11}$  in KBr pallet.

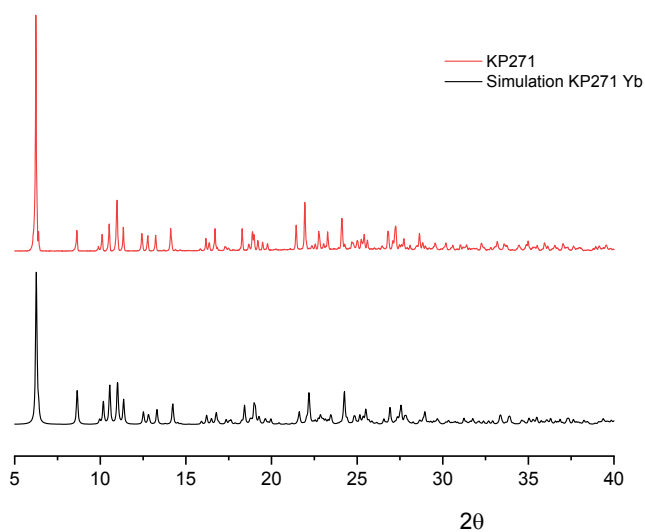

**Figure S31.** PXRD of measured  $\text{C}_{34}\text{H}_{34}\text{Br}_2\text{YbN}_{13}\text{O}_{11}$  and simulated  $\text{C}_{34}\text{H}_{34}\text{Br}_2\text{YbN}_{13}\text{O}_{11}$

$\text{C}_{34}\text{H}_{34}\text{Br}_2\text{LuN}_{13}\text{O}_{11}$ ; Yield 77% (based on  $\text{Lu}(\text{NO}_3)_2 \cdot 5\text{H}_2\text{O}$ ). Elemental analysis calcd for  $(\text{C}_{34}\text{H}_{34}\text{Br}_2\text{LuN}_{13}\text{O}_{11} \cdot 2\text{H}_2\text{O})$ : C, 34.86%; H, 3.27%; N, 15.54%. Found: C, 34.73%; H, 3.13%; N, 15.38%. FT-IR ( $\text{cm}^{-1}$ ) KBr: 3436s, 1614s, 1591s, 1533w, 1487m, 1451s, 1382s, 1321m, 1295m, 1250m, 1116w, 1073w, 1030w, 945w, 881w, 824w, 738m.

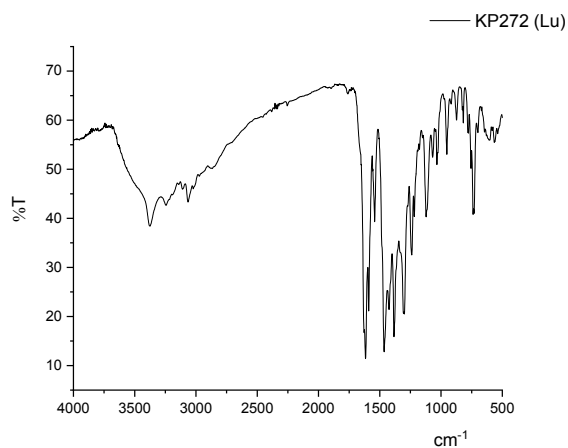

**Figure S32.** IR spectra of  $\text{C}_{34}\text{H}_{34}\text{Br}_2\text{LuN}_{13}\text{O}_{11}$  in KBr pallet.

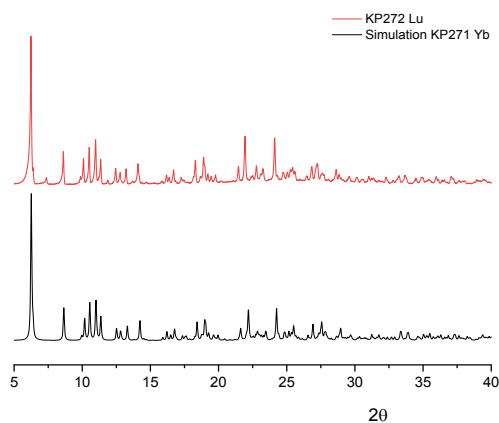

**Figure S33.** PXRD of measured  $\text{C}_{34}\text{H}_{34}\text{Br}_2\text{LuN}_{13}\text{O}_{11}$  and simulated  $\text{C}_{34}\text{H}_{34}\text{Br}_2\text{YbN}_{13}\text{O}_{11}$

$\text{C}_{34}\text{H}_{34}\text{Br}_2\text{YbN}_{13}\text{O}_{11}$ : Yield 67% (based on  $\text{Y}(\text{NO}_3)_2 \cdot 6\text{H}_2\text{O}$ ). Elemental analysis calcd for ( $\text{C}_{34}\text{H}_{34}\text{Br}_2\text{YbN}_{13}\text{O}_{11}$ ): C, 38.91%; H, 3.27%; N, 17.35%. Found: C, 38.71%; H, 3.53%; N, 17.40%.

FT-IR ( $\text{cm}^{-1}$ ) KBr: 3390s, 3242w, 3056w, 1621s, 1540m, 1463s, 1429m, 1380s, 1310s, 1240s, 1118m, 1030w, 651w, 874w, 813w, 779w, 734m.

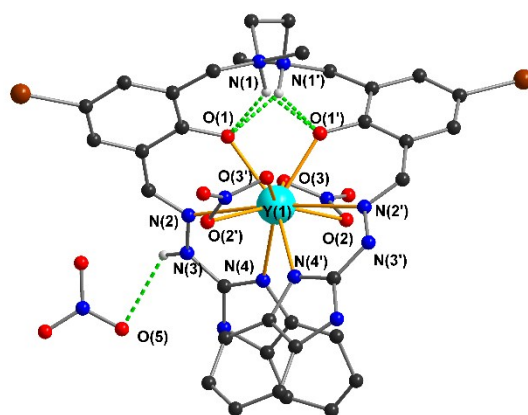

**Figure S34.** The structure of **YLH<sub>6</sub>**. Colour codes for the atoms: light blue (Y), blue (N), red (O) black (C) and brown (Br). The hydrogen bond highlight in green dash line. Solvent molecules (MeCN) in lattice and H atoms are omitted for clarity.

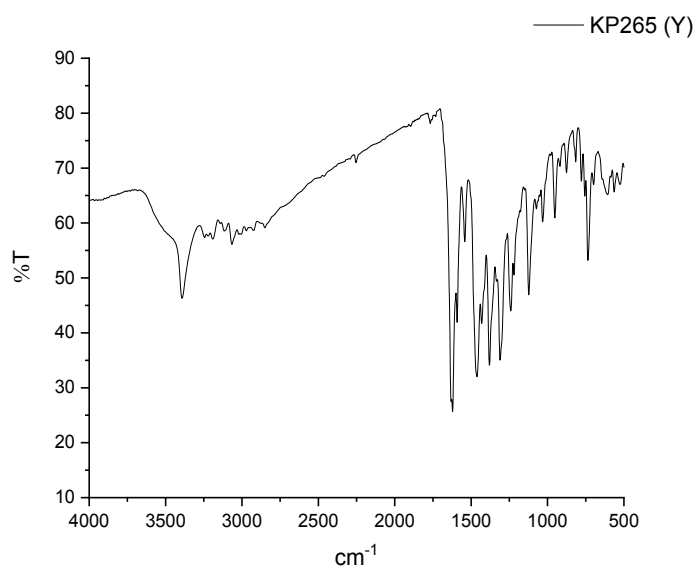

**Figure S35.** IR spectra of **C<sub>34</sub>H<sub>34</sub>Br<sub>2</sub>LuN<sub>13</sub>O<sub>11</sub>** in KBr pallet.

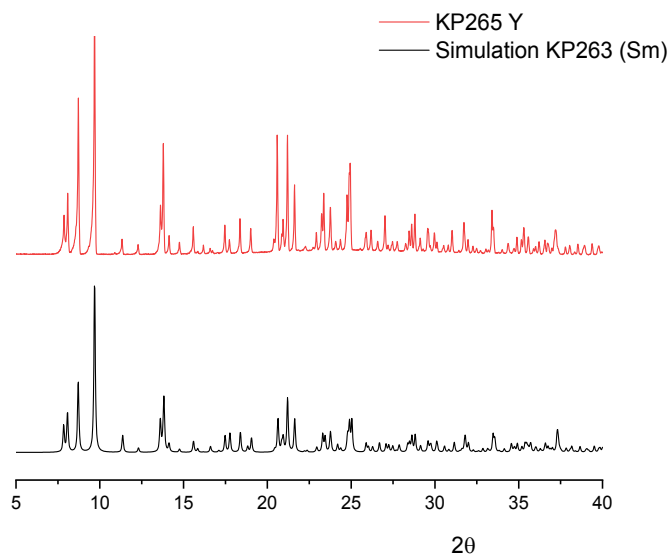

**Figure S36.** PXRD of measured  $C_{34}H_{34}Br_2YN_{13}O_{11}$  and simulated  $C_{34}H_{34}Br_2SmN_{13}O_{11}$

### Catalytic properties study

**General procedure for the synthesis of trans-4,5-dimorpholino-cyclopent-2-enone (5) in MeCN: catalytic efficiency of the series of Ln(III)-complexes and Y(III)-complex.** To a solution of Ln(III)-LH<sub>6</sub> (20 mg, 1.0 mol% loading) and 200 mg 4Å molecularsieve in MeCN (10 mL) were added morpholine (195 μl, 2.2 mmol) and furfural (85 μl, 1.0 mmol). The mixture was allowed to stir vigorously at room temperature for 2h. Then the reaction mixture was sampled 500 μl, filtered through celeit and washed with 5 mL of CH<sub>2</sub>Cl<sub>2</sub>. The solvent was evaporated under reduced pressure, and the crude product was analysed by <sup>1</sup>H NMR.

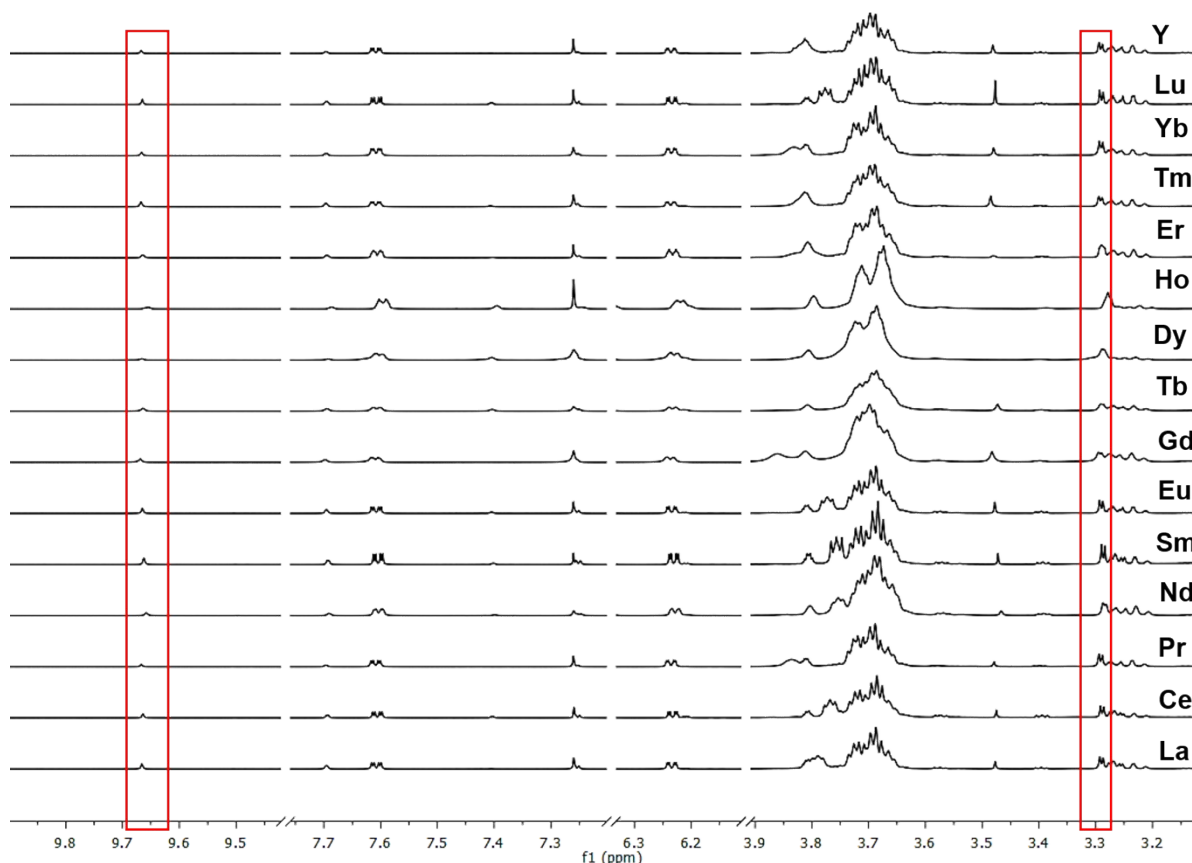

**Figure S37.** Time dependency experiment 1.0 mol% catalytic loading following by  $^1\text{H}$ -NMR

**General procedure for the synthesis of trans-4,5-dimorpholino-cyclopent-2-enone (5) in MeCN time dependency experiments.** To a solution of  $\text{DyLH}_6$  (0.5 mol% and 1.0 mol% loading) and 200 mg  $4\text{\AA}$  molecularsieve in MeCN (10 mL) were added morpholine (195  $\mu\text{l}$ , 2.2 mmol) and furfural (85  $\mu\text{l}$ , 1.0 mmol). The mixture was allowed to stir vigorously at room temperature. Then the reaction mixture was sampled 500  $\mu\text{l}$ , filtered through celeit and washed with 5 mL of  $\text{CH}_2\text{Cl}_2$ . The solvent was evaporated under reduced pressure, and the crude product was analysed by  $^1\text{H}$  NMR.

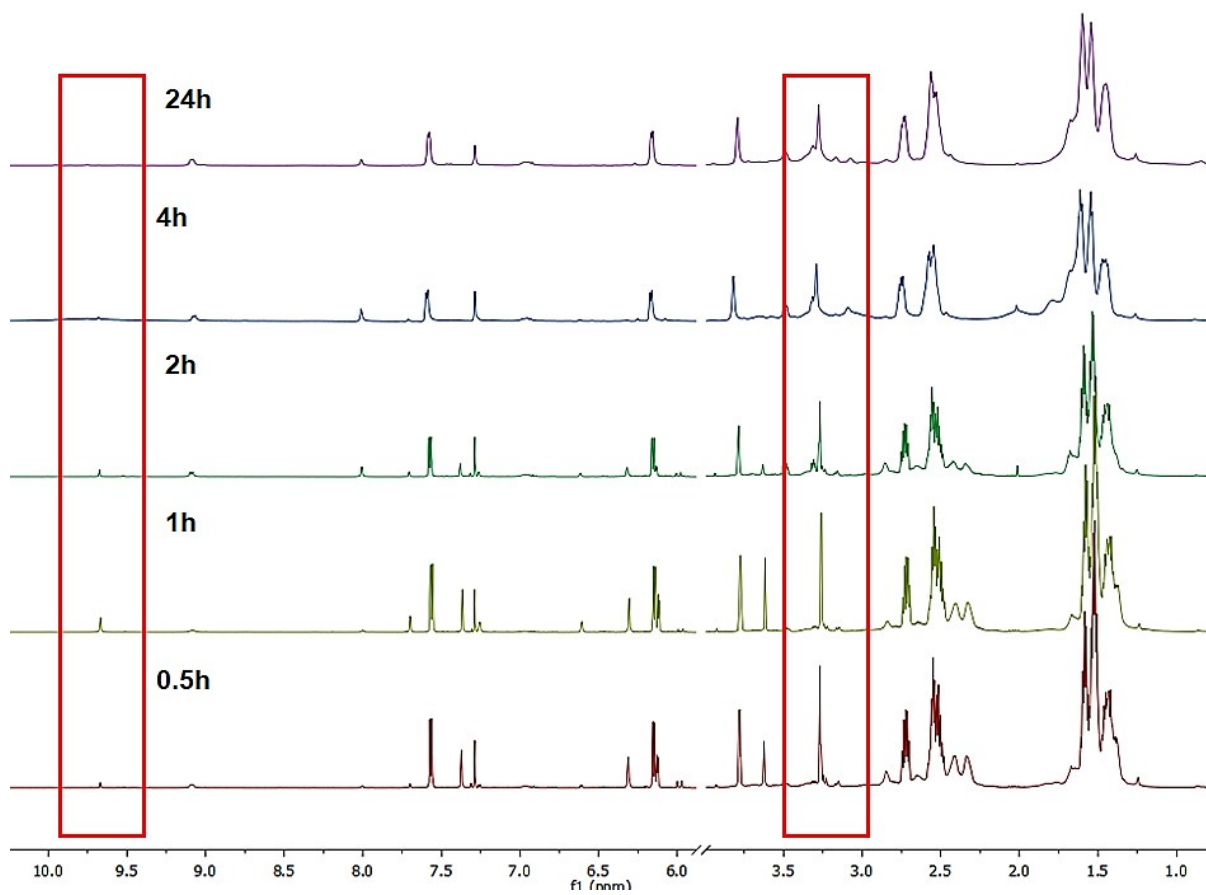

**Figure S38.** Time dependency experiment 0.5 mol% catalytic loading following by  $^1\text{H-NMR}$



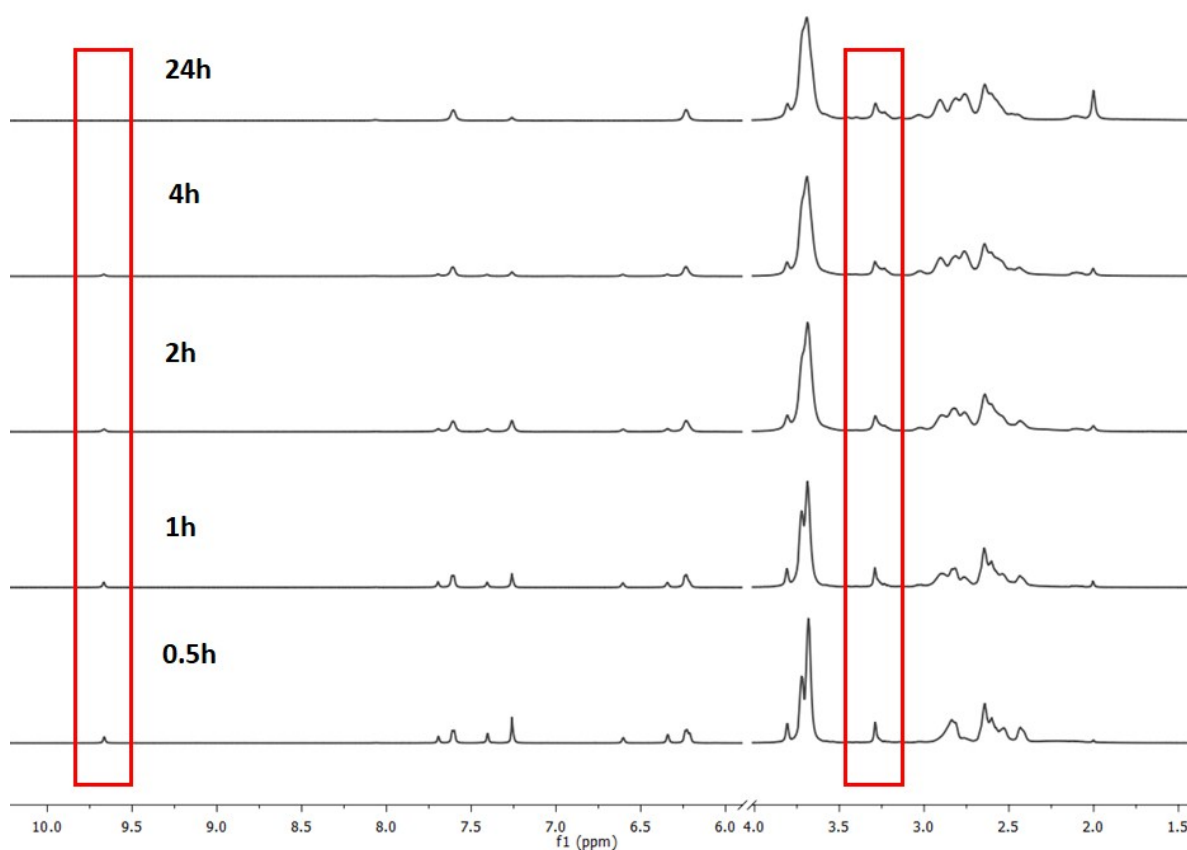

**Figure S39.** Time dependency experiment 1.0 mol% catalytic loading following by  $^1\text{H}$ -NMR

**General procedure for the investigation of the efficiency of catalyst for the transformation of furfural to trans-4,5-amino-cyclopent-2-enone in MeCN.** To a solution of  $\{\text{Ln(III)-L4}\}$  (1 mol%) and 200 mg  $4\text{\AA}$  molecularsieve in MeCN (10 mL) were added morpholine (195  $\mu\text{l}$ , 2.2 mmol) and furfural (85  $\mu\text{l}$ , 1.0 mmol). The mixture was allowed to stir vigorously at room temperature for 4 h. Then the resulting solution was filtered through celite, washed with  $\text{CH}_2\text{Cl}_2$ . The solvent was evaporated under reduced pressure, and the crude product was purifying by column chromatography to obtain colourless oil product (98% yield).  $^1\text{H}$  NMR (500 MHz,  $\text{CDCl}_3$ ) =  $\delta$  7.60 (dd,  $J$  = 6.2, 2.2 Hz, 1H), 8.32 (dd,  $J$  = 6.2, 1.8 Hz, 1H), 3.80 (q,  $J$  = 2.3 Hz, 1H), 3.72 (td,  $J$  = 4.7, 4.2, 2.1 Hz, 4H), 3.67 (t,  $J$  = 4.7 Hz, 4H), 3.28 (d,  $J$  = 3.1 Hz, 1H), 2.81 (dt,  $J$  = 11.5, 4.7 Hz, 2H), 2.69 – 2.54 (m, 6H).

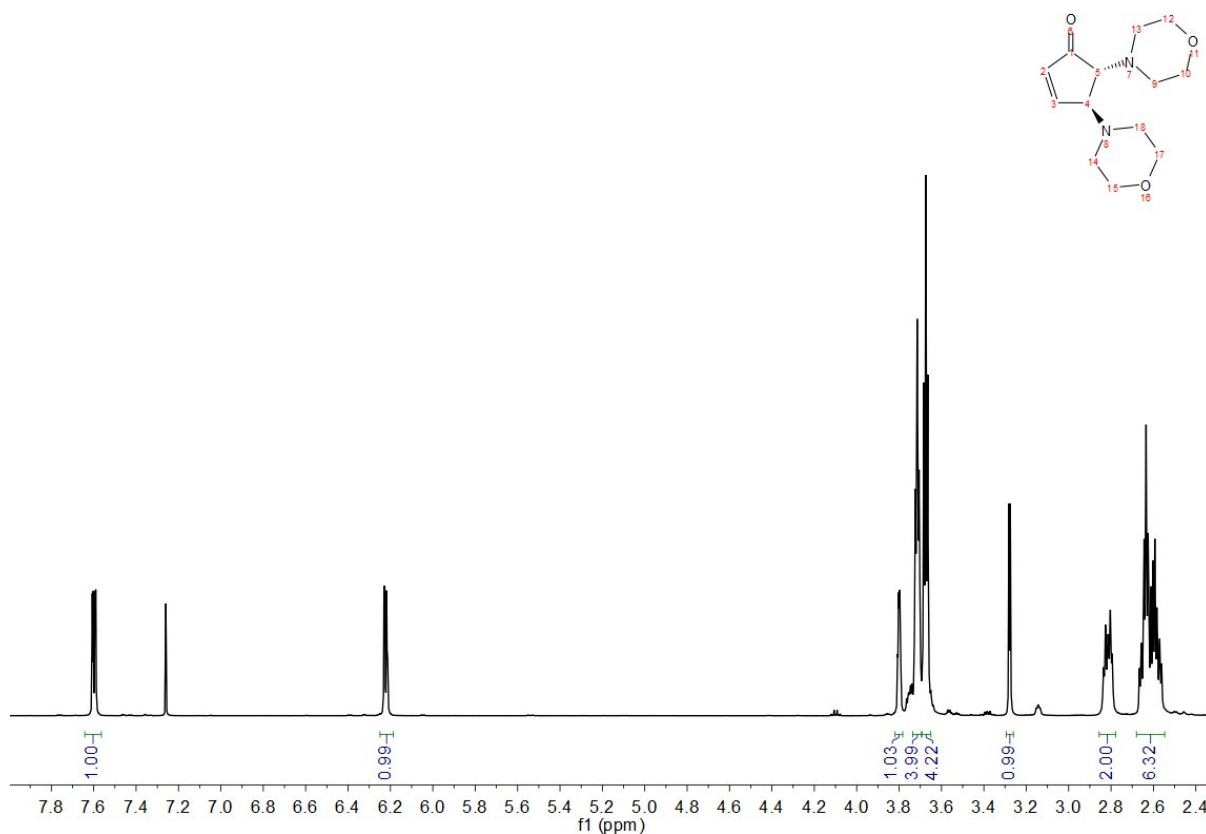

**General procedure for the synthesis of trans-4,5-amino-cyclopent-2-enone in MeCN.** To a solution of **DyLH<sub>6</sub>** (112 mg, 1mol%) and 200 mg 4Å molecularsieve in MeCN (10 mL) were added amine (2.2 mmol) and furfural (1.0 mmol). The mixture was allowed to stir vigorously at room temperature for 4 h. Then the resulting solution was filtered through celite, washed with CH<sub>2</sub>Cl<sub>2</sub>. The solvent was evaporated under reduced pressure, and the crude product was purified by column chromatography.

**Compound 6:**  $^1\text{H}$  NMR (500 MHz,  $\text{CDCl}_3$ )  $\delta$  7.57 (dd,  $J = 6.2, 2.2$  Hz, 1H), 6.15 (dd,  $J = 6.2, 1.9$  Hz, 1H), 3.78 (q,  $J = 2.3$  Hz, 1H), 3.26 (d,  $J = 2.8$  Hz, 1H), 2.72 (dt,  $J = 10.9, 5.3$  Hz, 2H), 2.61 – 2.45 (m, 9H), 1.62 – 1.55 (m, 4H), 1.56 – 1.49 (m, 4H), 1.49 – 1.38 (m, 4H).

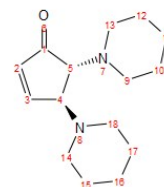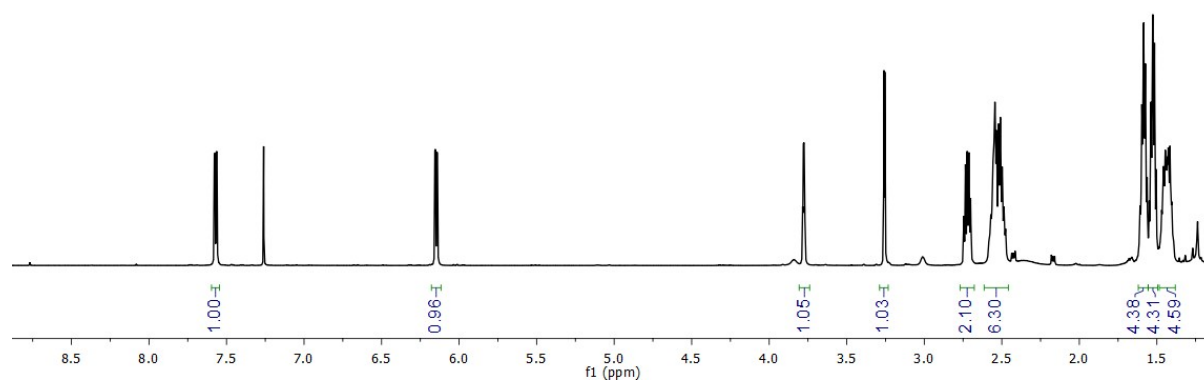

**Compound 7:**  $^1\text{H}$  NMR (500 MHz,  $\text{CDCl}_3$ )  $\delta$  7.60 (dd,  $J = 6.1, 2.2$  Hz, 1H), 6.20 (dd,  $J = 6.1, 1.6$  Hz, 1H), 3.76 (q,  $J = 2.2$  Hz, 1H), 3.32 (d,  $J = 2.7$  Hz, 1H), 2.99 – 2.85 (m, 2H), 2.76 – 2.61 (m, 6H), 1.81 – 1.70 (m, 8H).

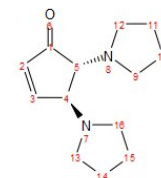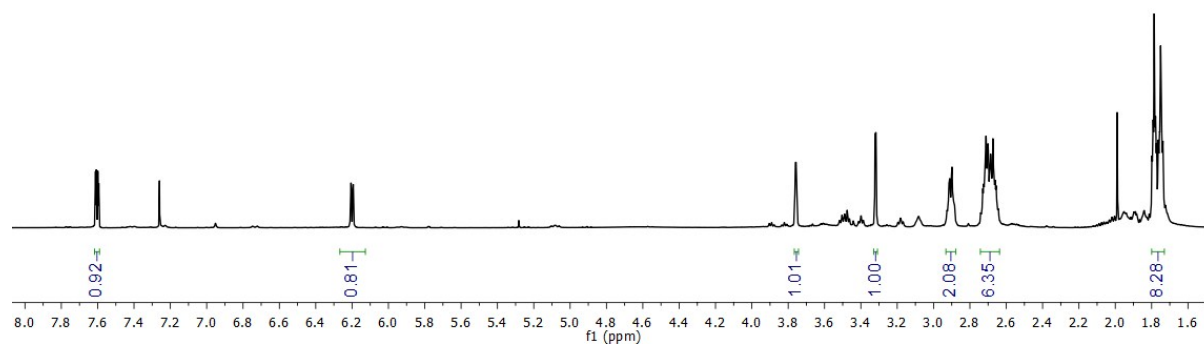

**Compound 8:**  $^1\text{H}$  NMR (500 MHz,  $\text{CDCl}_3$ )  $\delta$  7.41 (dd,  $J = 6.1, 2.0$  Hz, 1H), 6.12 (dd,  $J = 6.2, 1.9$  Hz, 1H), 3.79 (q,  $J = 2.3$  Hz, 1H), 3.23 (d,  $J = 3.1$  Hz, 1H), 2.81-2.73 (m, 2H), 2.70-2.61 (m, 6H), 1.63 – 1.43 (m, 19H).

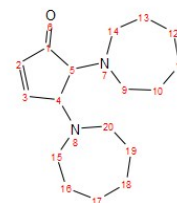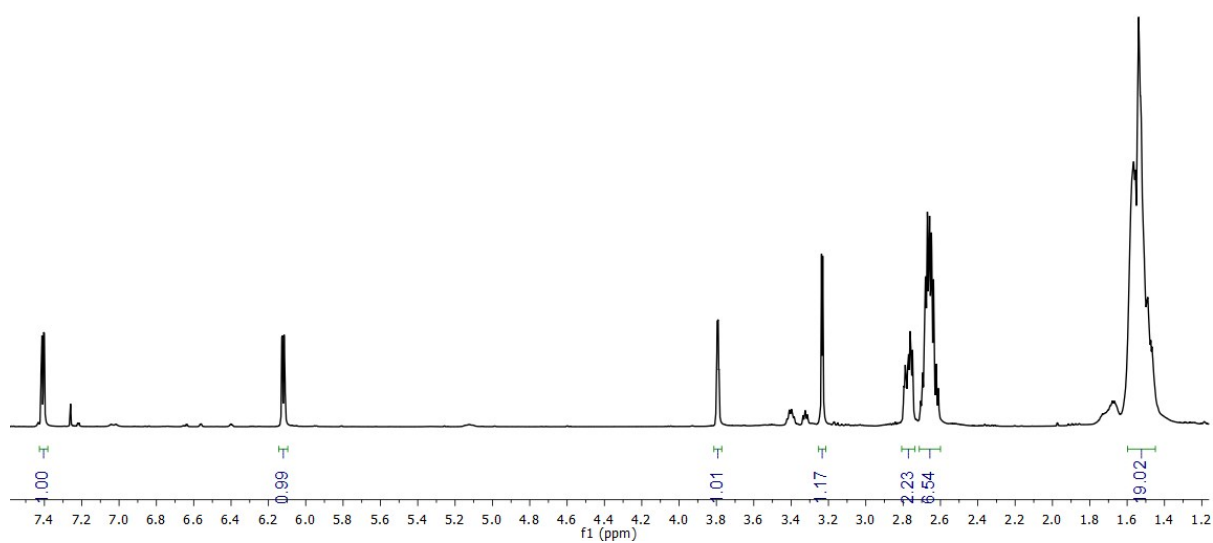

**Compound 9a:**  $^1\text{H}$  NMR (500 MHz,  $\text{CDCl}_3$ )  $\delta$  7.63 (dd,  $J = 6.0, 2.0$  Hz, 1H), 7.24 – 7.19 (m, 2H), 7.18 – 7.12 (m, 2H), 6.85 – 6.76 (m, 4H), 6.77 – 6.71 (m, 2H), 6.41 (dd,  $J = 6.0, 1.6$  Hz, 1H), 4.61 (s, 1H), 3.87 (d,  $J = 2.9$  Hz, 1H).

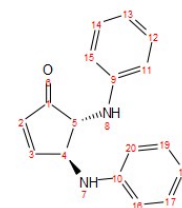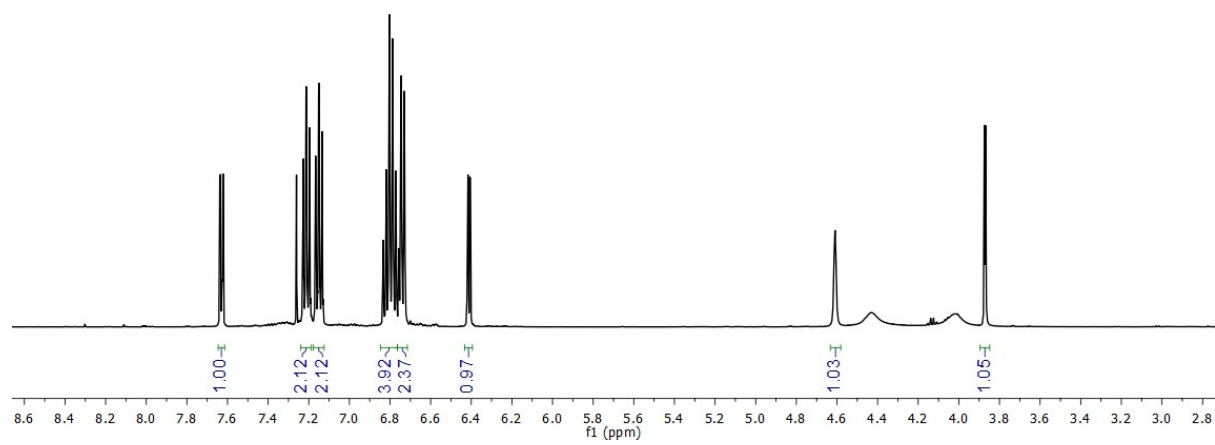

**Compound 9b:**  $^1\text{H}$  NMR (500 MHz,  $\text{CDCl}_3$ )  $\delta$  7.36 – 7.30 (m, 2H), 7.26 – 7.20 (m, 2H), 7.09 – 7.05 (m, 2H), 7.02 – 6.97 (m, 1H), 6.82 – 6.77 (m, 1H), 6.72 – 6.67 (m, 2H), 6.65 (d,  $J = 3.1$  Hz, 1H), 6.37 (s, 1H), 4.78 (ddd,  $J = 5.9, 3.1, 1.8$  Hz, 1H), 4.01 (s, 1H), 3.00 (dd,  $J = 19.1, 5.8$  Hz, 1H), 2.33 (dd,  $J = 19.1, 1.7$  Hz, 1H).

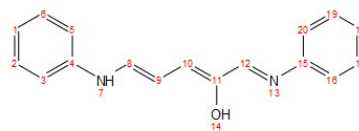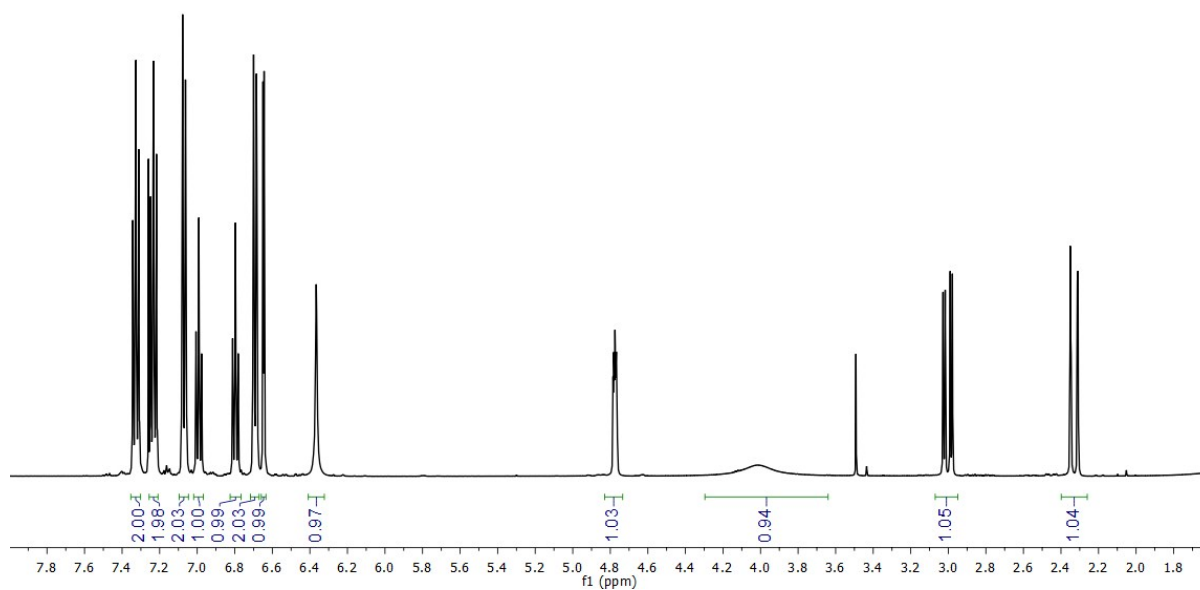

**Compound 10:**  $^1\text{H}$  NMR (500 MHz,  $\text{CDCl}_3$ )  $\delta$  7.44 – 7.39 (m, 2H), 7.33 – 7.29 (m, 2H), 6.97 – 6.91 (m, 2H), 6.60 – 6.53 (m, 3H), 6.36 (s, 1H), 4.72 (ddd,  $J = 5.9, 3.2, 1.7$  Hz, 1H), 2.98 (dd,  $J = 19.1, 5.9$  Hz, 1H), 2.31 (dd,  $J = 19.1, 1.7$  Hz, 1H).

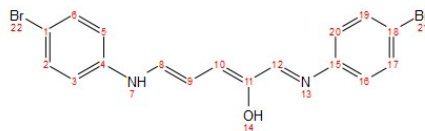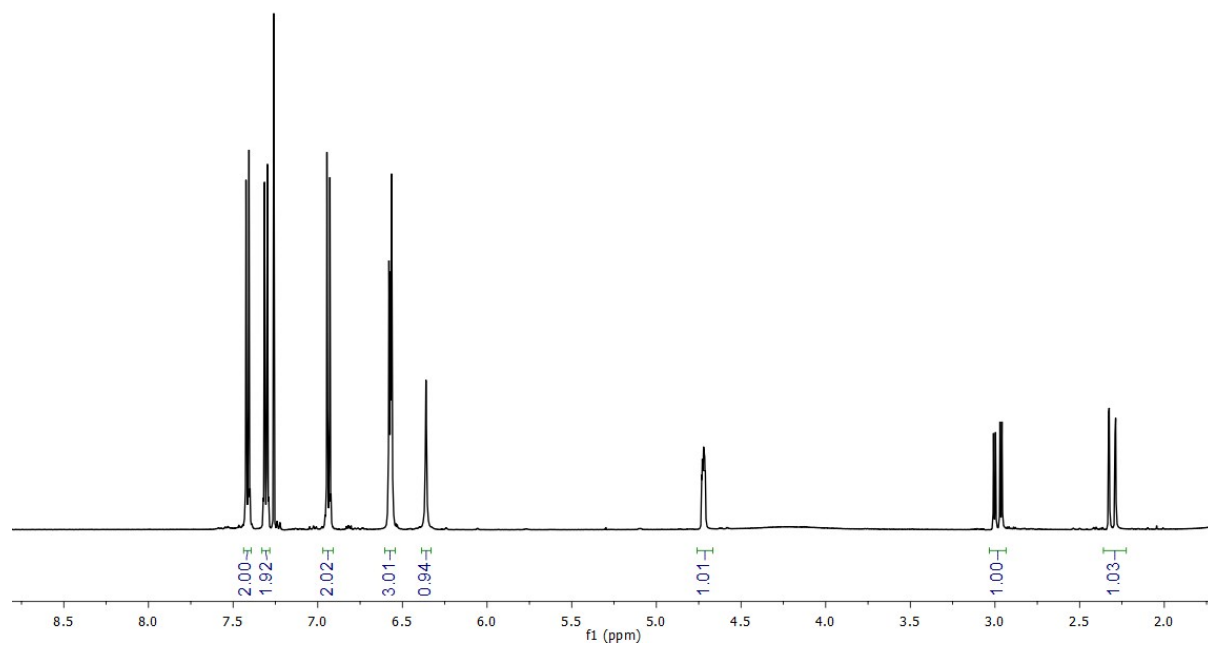



**Compound 11:**  $^1\text{H}$  NMR (500 MHz,  $\text{CDCl}_3$ )  $\delta$  8.11 (s, 1H), 7.49 (s, 1H), 6.72 (s, 1H), 6.46 (s, 1H), 3.70 (t,  $J = 7.1$  Hz, 2H), 2.65 ( $J = 7.1$  Hz, 2H), 2.29 (s, 6H).

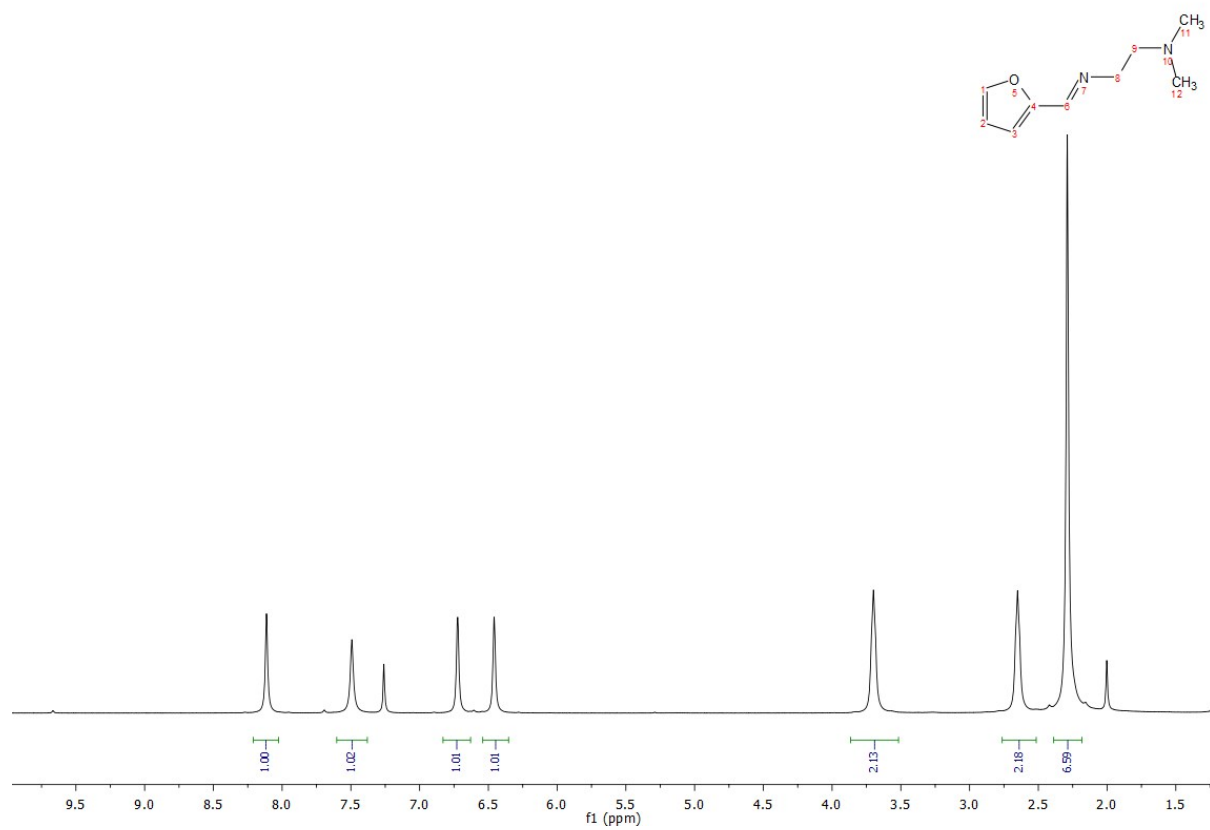

**Compound 12:**  $^1\text{H}$  NMR (500 MHz,  $\text{CDCl}_3$ )  $\delta$  8.11 (s, 1H), 7.51 (s, 1H), 6.74 (s, 1H), 6.47 (s, 1H), 3.76-3.71 (m, 4H), 3.37 (s, 3H).

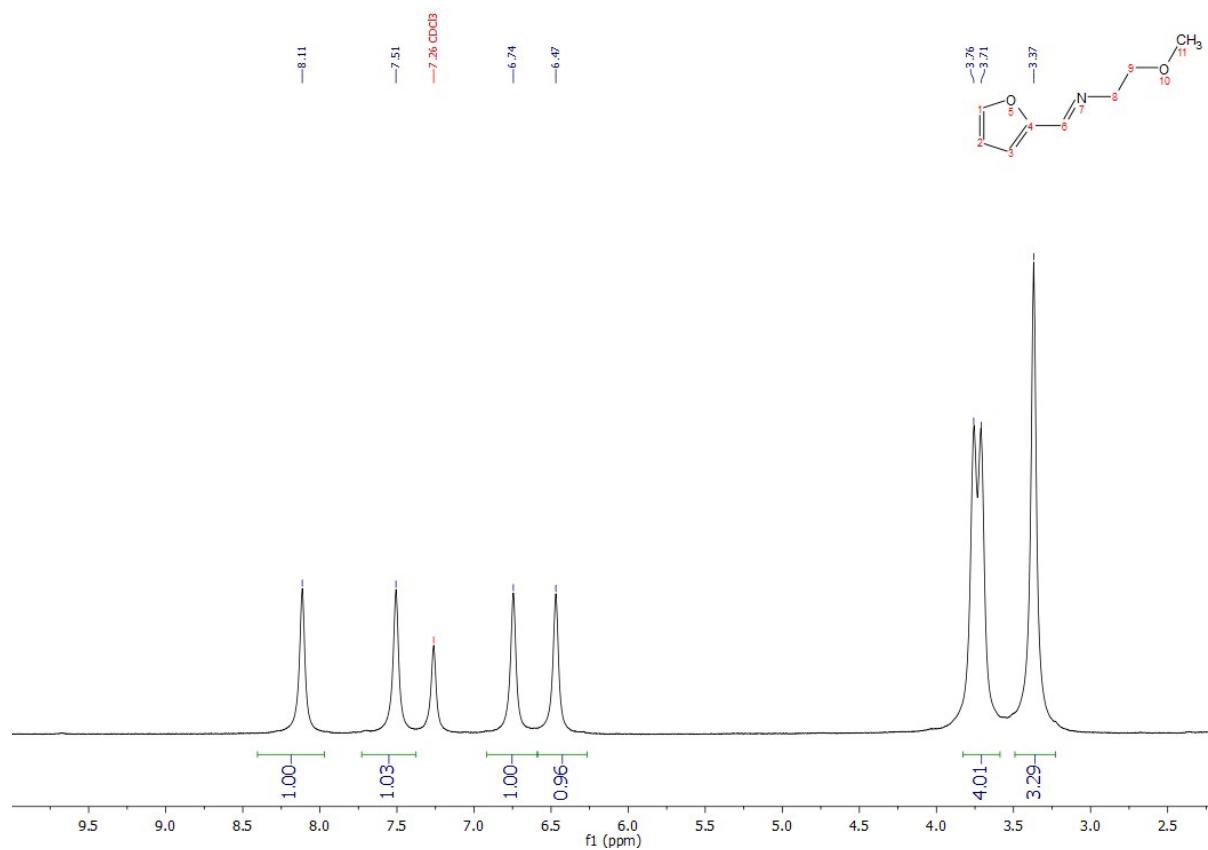

**Compound 13:**  $^1\text{H}$  NMR (500 MHz,  $\text{CDCl}_3$ )  $\delta$  8.17 (t,  $J = 1.5$  Hz, 1H), 7.37-7.31 (m, 4H), 7.27 (ddd,  $J = 6.3, 4.8, 2.6$  Hz, 1H), 6.78 (d,  $J = 3.4$  Hz, 1H), 6.48 (dd,  $J = 3.4, 1.8$  Hz, 1H), 4.79 (d,  $J = 1.4$  Hz, 2H).

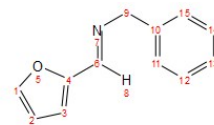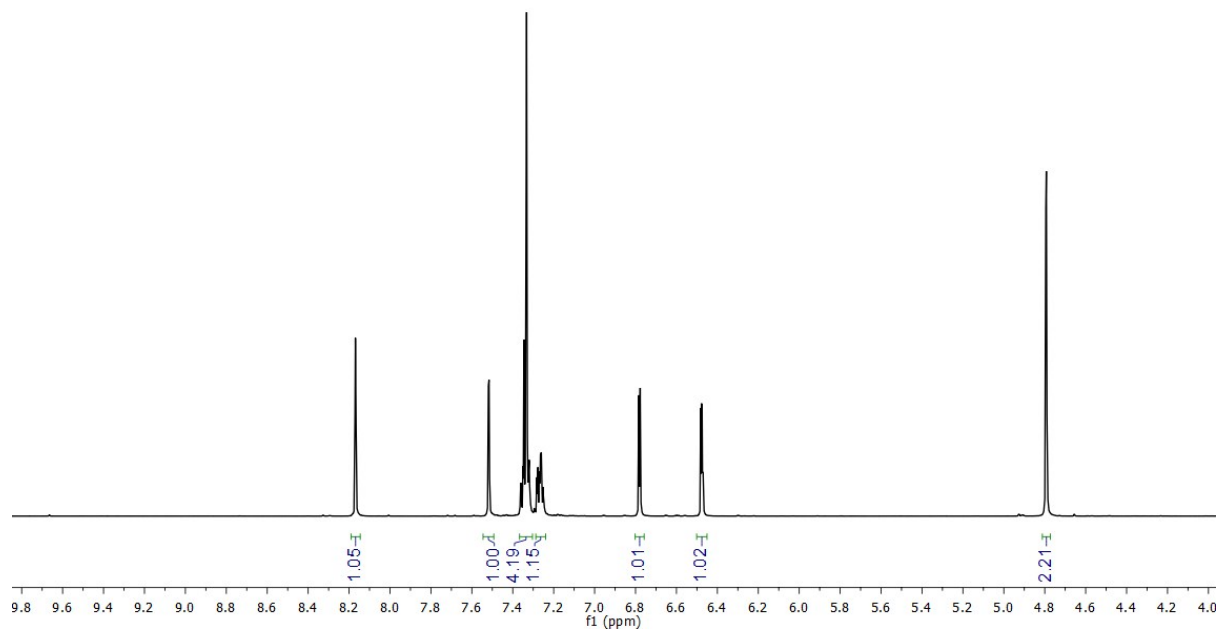

**Compound 14:**  $^1\text{H}$  NMR (500 MHz, DMSO- $d_6$ )  $\delta$  7.52 (d,  $J = 1.6$  Hz, 1H), 7.44 (t,  $J = 6.8$  Hz, 4H), 7.29 (t,  $J = 7.6$  Hz, 2H), 7.20 (dt,  $J = 18.0, 7.4$  Hz, 3H), 6.26 – 6.21 (m, 1H), 6.08 (d,  $J = 3.2$  Hz, 1H), 5.71 (s, 1H), 4.42 (t,  $J = 6.6$  Hz, 1H), 3.08 – 2.93 (m, 1H), 2.83 (dt,  $J = 10.7, 7.4$  Hz, 1H), 1.94 – 1.82 (m, 1H), 1.70 – 1.58 (m, 1H), 1.58 – 1.45 (m, 2H).

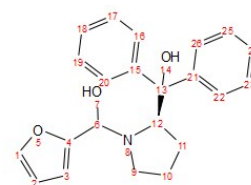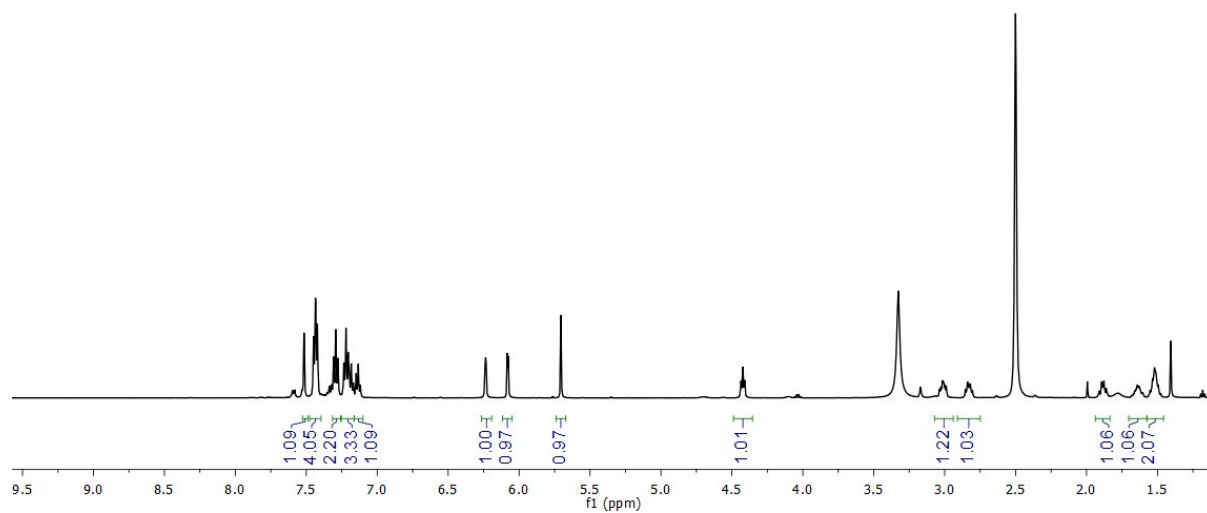

Table S1. Crystal data and structure refinement for **SmLH<sub>6</sub>** and **YbLH<sub>6</sub>**

| Compound                                     | SmLH <sub>6</sub> (CCDC = 1956883)                                                 | YbLH <sub>6</sub> (CCDC = 1939447)                                                 |
|----------------------------------------------|------------------------------------------------------------------------------------|------------------------------------------------------------------------------------|
| Empirical formula                            | C <sub>40</sub> H <sub>43</sub> Br <sub>2</sub> N <sub>16</sub> O <sub>11</sub> Sm | C <sub>38</sub> H <sub>47</sub> Br <sub>2</sub> N <sub>14</sub> O <sub>14</sub> Yb |
| Formula weight                               | 1234.07                                                                            | 1256.75                                                                            |
| Temperature/K                                | 150.15                                                                             | 150.15                                                                             |
| Crystal system                               | hexagonal                                                                          | triclinic                                                                          |
| Space group                                  | P6 <sub>1</sub> 22                                                                 | P-1                                                                                |
| a [Å]                                        | 13.00110(10)                                                                       | 10.3185(3)                                                                         |
| b [Å]                                        | 13.00110(10)                                                                       | 16.0985(5)                                                                         |
| c [Å]                                        | 46.6991(4)                                                                         | 16.1412(5)                                                                         |
| α [°]                                        | 90                                                                                 | 118.099(2)                                                                         |
| β [°]                                        | 90                                                                                 | 96.000(2)                                                                          |
| γ [°]                                        | 120                                                                                | 92.008(2)                                                                          |
| Volume [Å <sup>3</sup> ]                     | 6831.56(12)                                                                        | 2341.39(13)                                                                        |
| Z                                            | 6                                                                                  | 2                                                                                  |
| ρ <sub>calc</sub> [cm <sup>3</sup> ]         | 1.800                                                                              | 1.783                                                                              |
| μ [mm <sup>-1</sup> ]                        | 8.544                                                                              | 6.383                                                                              |
| F(000)                                       | 3690.0                                                                             | 1250.0                                                                             |
| Crystal size [mm <sup>3</sup> ]              | 0.2 × 0.17 × 0.15                                                                  | 0.28 × 0.18 × 0.04                                                                 |
| Radiation                                    | GaKα (λ = 1.34143)                                                                 | CuKα (λ = 1.54186)                                                                 |
| 2θ range for data collection [°]             | 6.83 to 138.826                                                                    | 10.98 to 145.732                                                                   |
| Index ranges                                 | -17 ≤ h ≤ 13, -16 ≤ k ≤ 17, -46 ≤ l ≤ 63                                           | -7 ≤ h ≤ 12, -17 ≤ k ≤ 19, -19 ≤ l ≤ 19                                            |
| Reflections collected                        | 90987                                                                              | 20575                                                                              |
| Independent reflections                      | 5066 [R <sub>int</sub> = 0.0328, R <sub>sigma</sub> = 0.0097]                      | 8960 [R <sub>int</sub> = 0.0486, R <sub>sigma</sub> = 0.0438]                      |
| Data/restraints/parameters                   | 6066/0/320                                                                         | 8960/4/632                                                                         |
| Goodness-of-fit on F <sup>2</sup>            | 1.068                                                                              | 1.066                                                                              |
| Final R indexes [I >= 2σ (I)]                | R <sub>1</sub> = 0.0235, wR <sub>2</sub> = 0.0649                                  | R <sub>1</sub> = 0.0601, wR <sub>2</sub> = 0.1546                                  |
| Final R indexes [all data]                   | R <sub>1</sub> = 0.0242, wR <sub>2</sub> = 0.0655                                  | R <sub>1</sub> = 0.0639, wR <sub>2</sub> = 0.1604                                  |
| Largest diff. peak/hole [e Å <sup>-3</sup> ] | 0.49/-0.51                                                                         | 2.68/-2.94                                                                         |
| Flack parameter                              | 0.023(3)                                                                           | -                                                                                  |

Table S2. Crystal data and structure refinement for **ErLH<sub>6</sub>** and **YLH<sub>6</sub>**

| Compound                                     | ErLH <sub>6</sub> (CCDC = 1956884)                                                | YLH <sub>6</sub> (CCDC = 1956885)                                                 |
|----------------------------------------------|-----------------------------------------------------------------------------------|-----------------------------------------------------------------------------------|
| Empirical formula                            | C <sub>34</sub> H <sub>36</sub> Br <sub>2</sub> ErN <sub>13</sub> O <sub>12</sub> | C <sub>40</sub> H <sub>43</sub> Br <sub>2</sub> N <sub>16</sub> O <sub>11</sub> Y |
| Formula weight                               | 1145.84                                                                           | 1172.63                                                                           |
| Temperature/K                                | 180                                                                               | 150.15                                                                            |
| Crystal system                               | monoclinic                                                                        | hexagonal                                                                         |
| Space group                                  | P2 <sub>1</sub> /c                                                                | P6 <sub>1</sub> 22                                                                |
| a [Å]                                        | 12.4509(3)                                                                        | 12.93430(10)                                                                      |
| b [Å]                                        | 18.1610(4)                                                                        | 12.93430(10)                                                                      |
| c [Å]                                        | 21.2663(6)                                                                        | 46.4828(6)                                                                        |
| α [°]                                        | 90                                                                                | 90                                                                                |
| β [°]                                        | 93.752(2)                                                                         | 90                                                                                |
| γ [°]                                        | 90                                                                                | 120                                                                               |
| Volume [Å <sup>3</sup> ]                     | 4798.4(2)                                                                         | 6734.55(14)                                                                       |
| Z                                            | 4                                                                                 | 6                                                                                 |
| ρ <sub>calc</sub> [cm <sup>3</sup> ]         | 1.586                                                                             | 1.735                                                                             |
| μ [mm <sup>-1</sup> ]                        | 7.403                                                                             | 3.114                                                                             |
| F(000)                                       | 2260.0                                                                            | 3522.0                                                                            |
| Crystal size [mm <sup>3</sup> ]              | 0.2 × 0.04 × 0.03                                                                 | 0.25 × 0.24 × 0.23                                                                |
| Radiation                                    | GaKα (λ = 1.34143)                                                                | GaKα (λ = 1.34143)                                                                |
| 2θ range for data collection [°]             | 5.572 to 124.992                                                                  | 6.866 to 124.968                                                                  |
| Index ranges                                 | -13 ≤ h ≤ 16, -8 ≤ k ≤ 23, -27 ≤ l ≤ 27                                           | -17 ≤ h ≤ 8, -16 ≤ k ≤ 17, -59 ≤ l ≤ 61                                           |
| Reflections collected                        | 29620                                                                             | 69788                                                                             |
| Independent reflections                      | 11293 [R <sub>int</sub> = 0.0258, R <sub>sigma</sub> = 0.0321]                    | 5433 [R <sub>int</sub> = 0.0175, R <sub>sigma</sub> = 0.0064]                     |
| Data/restraints/parameters                   | 11293/5/555                                                                       | 5433/2/302                                                                        |
| Goodness-of-fit on F <sup>2</sup>            | 1.065                                                                             | 1.063                                                                             |
| Final R indexes [I >= 2σ (I)]                | R <sub>1</sub> = 0.0534, wR <sub>2</sub> = 0.1596                                 | R <sub>1</sub> = 0.0266, wR <sub>2</sub> = 0.0758                                 |
| Final R indexes [all data]                   | R <sub>1</sub> = 0.0636, wR <sub>2</sub> = 0.1651                                 | R <sub>1</sub> = 0.0268, wR <sub>2</sub> = 0.0760                                 |
| Largest diff. peak/hole [e Å <sup>-3</sup> ] | 1.81/-1.06                                                                        | 0.77/-0.63                                                                        |
| Flack parameter                              | -                                                                                 | -0.013(3)                                                                         |

## SHAPE analysis

### Sm(III)LH<sub>6</sub>

Ideal structures ML10

JSPC-10 10 C2v Sphenocorona J87  
SDD-10 11 D2 Staggered Dodecahedron (2:6:2)  
TD-10 12 C2v Tetradecahedron (2:6:2)  
HD-10 13 D4h Hexadecahedron (2:6:2) or (1:4:4:1)

---

Structure 1 [Sm]

|    |        |        |        |
|----|--------|--------|--------|
| Sm | 7.4135 | 4.2802 | 3.8891 |
| O  | 9.6182 | 4.3641 | 3.1292 |
| O  | 8.5885 | 6.1476 | 4.6490 |
| O  | 6.7060 | 4.6546 | 6.3412 |
| O  | 7.3840 | 3.4802 | 1.4369 |
| O  | 7.4633 | 5.6308 | 1.6866 |
| O  | 8.6080 | 3.6480 | 6.0916 |
| N  | 8.6353 | 1.8263 | 3.6234 |
| N  | 5.8993 | 6.5653 | 4.1548 |
| N  | 5.0587 | 4.2920 | 2.9414 |
| N  | 6.2464 | 2.2350 | 4.8368 |

JSPC-10 Ideal structure CShM = 2.00118

|    |    |        |        |        |
|----|----|--------|--------|--------|
| Sm | M  | 7.4201 | 4.2840 | 3.8891 |
| O  | L3 | 9.5589 | 4.2363 | 3.0271 |
| O  | L8 | 8.4482 | 6.1601 | 4.7510 |
| O  | L9 | 6.5614 | 4.9802 | 6.4698 |
| O  | L2 | 7.5937 | 3.1922 | 1.3084 |
| O  | L7 | 7.4560 | 5.8761 | 2.1354 |
| O  | L4 | 8.8169 | 3.5190 | 5.6427 |

|   |     |        |        |        |
|---|-----|--------|--------|--------|
| N | L1  | 8.4556 | 1.6993 | 3.5298 |
| N | L10 | 5.6994 | 6.4732 | 4.2484 |
| N | L6  | 5.3746 | 4.0983 | 2.7784 |
| N | L5  | 6.2365 | 2.6054 | 4.9998 |

SDD-10 Ideal structure CShM = 5.20977

|    |     |        |        |        |
|----|-----|--------|--------|--------|
| Sm | M   | 7.4201 | 4.2840 | 3.8891 |
| O  | L9  | 9.9058 | 4.2981 | 3.6883 |
| O  | L10 | 8.6751 | 6.4296 | 4.0898 |
| O  | L6  | 6.9787 | 5.0486 | 6.2214 |
| O  | L1  | 7.8615 | 3.5194 | 1.5568 |
| O  | L3  | 6.6309 | 5.6509 | 1.9583 |
| O  | L4  | 8.2093 | 2.9171 | 5.8199 |
| N  | L2  | 8.6507 | 2.1525 | 3.4876 |
| N  | L5  | 6.1895 | 6.4155 | 4.2906 |
| N  | L7  | 5.1552 | 3.8876 | 2.9237 |
| N  | L8  | 5.9444 | 2.5207 | 4.8545 |

TD-10 Ideal structure CShM = 4.05758

|    |     |        |        |        |
|----|-----|--------|--------|--------|
| Sm | M   | 7.4201 | 4.2840 | 3.8891 |
| O  | L9  | 9.8012 | 4.5053 | 3.1302 |
| O  | L10 | 8.8023 | 6.2355 | 4.6480 |
| O  | L5  | 6.9345 | 5.1251 | 6.2024 |
| O  | L2  | 7.9057 | 3.4429 | 1.5758 |
| O  | L4  | 6.6612 | 5.5985 | 1.8913 |
| O  | L3  | 8.1790 | 2.9696 | 5.8869 |
| N  | L1  | 8.6646 | 2.1285 | 3.5736 |
| N  | L6  | 6.1756 | 6.4395 | 4.2046 |
| N  | L8  | 5.1590 | 3.8548 | 2.8902 |
| N  | L7  | 5.9179 | 2.5404 | 4.8880 |



HD-10 Ideal structure CShM = 8.27439

|    |     |        |        |        |
|----|-----|--------|--------|--------|
| Sm | M   | 7.4201 | 4.2840 | 3.8891 |
| O  | L1  | 9.8713 | 4.2873 | 3.7916 |
| O  | L2  | 8.6486 | 6.4052 | 3.9866 |
| O  | L8  | 6.8932 | 5.1966 | 6.1044 |
| O  | L9  | 7.9470 | 3.3714 | 1.6738 |
| O  | L10 | 6.7243 | 5.4892 | 1.8689 |
| O  | L7  | 8.1159 | 3.0788 | 5.9093 |
| N  | L3  | 8.6428 | 2.1662 | 3.6940 |
| N  | L4  | 6.1974 | 6.4018 | 4.0841 |
| N  | L6  | 4.9689 | 4.2807 | 3.9866 |
| N  | L5  | 6.1916 | 2.1629 | 3.7916 |

### Yb(III)LH<sub>6</sub>

Ideal structures ML8

|          |       |                                            |
|----------|-------|--------------------------------------------|
| OP-8     | 1 D8h | Octagon                                    |
| HPY-8    | 2 C7v | Heptagonal pyramid                         |
| HBPY-8   | 3 D6h | Hexagonal bipyramid                        |
| CU-8     | 4 Oh  | Cube                                       |
| SAPR-8   | 5 D4d | Square antiprism                           |
| TDD-8    | 6 D2d | Triangular dodecahedron                    |
| JGBF-8   | 7 D2d | Johnson gyrobifastigium J26                |
| JETBPY-8 | 8 D3h | Johnson elongated triangular bipyramid J14 |
| JBTPR-8  | 9 C2v | Biaugmented trigonal prism J50             |

---

Structure 1 [Yb]

|   |        |         |         |
|---|--------|---------|---------|
| O | 8.3225 | 8.3636  | 6.8094  |
| O | 5.7011 | 7.7792  | 7.0350  |
| O | 6.1529 | 10.3982 | 8.0181  |
| O | 4.9800 | 9.1604  | 9.3481  |
| N | 7.3920 | 9.1458  | 10.8135 |
| N | 8.8911 | 10.1756 | 8.8361  |
| N | 6.2664 | 6.1125  | 9.1689  |
| N | 8.8080 | 6.8426  | 9.5483  |
| N | 5.0351 | 10.2110 | 8.6259  |

OP-8     Ideal structure   CShM = 33.58977

|   |    |        |         |        |
|---|----|--------|---------|--------|
| O | M  | 6.8388 | 8.6876  | 8.6893 |
| O | L1 | 5.4983 | 7.2349  | 8.1240 |
| O | L4 | 6.8661 | 10.7426 | 8.6309 |
| O | L2 | 4.9703 | 8.6881  | 7.8316 |
| N | L6 | 8.7073 | 8.6872  | 9.5469 |
| N | L5 | 8.1793 | 10.1404 | 9.2545 |
| N | L8 | 6.8115 | 6.6327  | 8.7476 |
| N | L7 | 8.1408 | 7.2343  | 9.3370 |
| N | L3 | 5.5368 | 10.1410 | 8.0416 |

HPY-8     Ideal structure   CShM = 28.00755

|   |    |        |         |         |
|---|----|--------|---------|---------|
| O | M  | 7.0007 | 8.6622  | 8.5146  |
| O | L2 | 5.5432 | 7.6213  | 7.3150  |
| O | L4 | 6.7092 | 10.7206 | 7.9447  |
| O | L1 | 5.5435 | 8.8911  | 10.0865 |
| N | L6 | 8.5880 | 8.7871  | 9.9678  |
| N | L5 | 8.0398 | 10.4130 | 9.2229  |
| N | L8 | 6.5859 | 6.5483  | 8.4378  |
| N | L7 | 7.9409 | 7.0671  | 9.6184  |

N L3 5.5981 9.4782 7.0956

HBPY-8 Ideal structure CShM = 22.78965

O M 6.8388 8.6876 8.6893  
O L1 6.4371 8.0036 6.6192  
O L2 7.1552 10.7519 7.9457  
O L4 4.8126 8.0281 9.3005  
N L8 7.2405 9.3717 10.7593  
N L7 8.8651 9.3472 8.0780  
N L5 6.5224 6.6234 9.4329  
N L6 8.5487 7.2830 8.8216  
N L3 5.1289 10.0923 8.5569

CU-8 Ideal structure CShM = 28.82803

O M 6.8388 8.6876 8.6893  
O L1 6.4629 8.0413 6.6966  
O L3 7.2520 10.7755 8.6918  
O L6 5.1280 8.3015 9.8950  
N L7 7.2147 9.3340 10.6820  
N L4 8.5497 9.0738 7.4835  
N L5 6.4256 6.5998 8.6867  
N L8 8.5124 7.6322 9.4736  
N L2 5.1652 9.7430 7.9049

SAPR-8 Ideal structure CShM = 26.71759

O M 6.8388 8.6876 8.6893  
O L1 6.5394 7.4284 6.9604  
O L2 6.4621 10.0507 7.0570  
O L6 4.7002 8.6355 8.3929

|   |    |        |         |         |
|---|----|--------|---------|---------|
| N | L8 | 7.6018 | 8.6357  | 10.7090 |
| N | L3 | 8.5139 | 10.0509 | 8.6947  |
| N | L5 | 6.2057 | 6.7814  | 9.4827  |
| N | L4 | 8.5912 | 7.4286  | 8.5981  |
| N | L7 | 6.0963 | 10.4899 | 9.6193  |

TDD-8 Ideal structure CShM = 27.15569

|   |    |        |         |         |
|---|----|--------|---------|---------|
| O | M  | 6.8388 | 8.6876  | 8.6893  |
| O | L1 | 6.2528 | 7.4335  | 7.0399  |
| O | L5 | 6.8828 | 9.9358  | 6.9352  |
| O | L2 | 4.6991 | 8.4832  | 8.8156  |
| N | L7 | 7.2153 | 8.8454  | 10.8034 |
| N | L8 | 8.5540 | 9.9716  | 8.9037  |
| N | L3 | 6.4658 | 6.7352  | 9.5172  |
| N | L4 | 8.5581 | 7.4861  | 8.2028  |
| N | L6 | 6.0825 | 10.6102 | 9.2962  |

JGBF-8 Ideal structure CShM = 23.76598

|   |    |        |         |         |
|---|----|--------|---------|---------|
| O | M  | 6.8388 | 8.6876  | 8.6893  |
| O | L3 | 6.4237 | 8.1039  | 7.0395  |
| O | L1 | 6.6111 | 10.6402 | 7.0752  |
| O | L6 | 5.2244 | 8.1609  | 9.2818  |
| N | L5 | 7.2539 | 9.2714  | 10.3390 |
| N | L4 | 8.4532 | 9.2144  | 8.0967  |
| N | L7 | 6.6514 | 6.1513  | 8.6535  |
| N | L8 | 8.6808 | 7.2618  | 9.7107  |
| N | L2 | 5.4119 | 10.6973 | 9.3176  |

JETBPY-8 Ideal structure CShM = 27.67001

|   |    |        |         |         |
|---|----|--------|---------|---------|
| O | M  | 6.8388 | 8.6876  | 8.6893  |
| O | L1 | 5.5454 | 8.1904  | 7.6105  |
| O | L3 | 6.7428 | 10.1501 | 7.7218  |
| O | L5 | 5.5020 | 9.4567  | 9.5292  |
| N | L6 | 7.3195 | 8.3006  | 10.3333 |
| N | L4 | 8.5603 | 8.9939  | 8.5260  |
| N | L2 | 7.3629 | 7.0342  | 8.4147  |
| N | L8 | 9.2315 | 7.1656  | 9.7480  |
| N | L7 | 4.4461 | 10.2097 | 7.6305  |

JBTPR-8 Ideal structure CShM = 22.49907

|   |    |        |         |         |
|---|----|--------|---------|---------|
| O | M  | 7.0246 | 8.6978  | 8.4541  |
| O | L3 | 6.4960 | 7.3438  | 6.9805  |
| O | L5 | 6.3974 | 10.0518 | 7.0196  |
| O | L1 | 4.9927 | 8.6183  | 8.8407  |
| N | L2 | 7.1177 | 8.6713  | 10.5217 |
| N | L6 | 8.5225 | 10.1048 | 8.7006  |
| N | L7 | 6.2736 | 6.3168  | 9.4786  |
| N | L4 | 8.6211 | 7.3968  | 8.6615  |
| N | L8 | 6.1036 | 10.9874 | 9.5460  |

### Y(III)LH<sub>6</sub>

Ideal structures ML10

|            |   |      |                                  |
|------------|---|------|----------------------------------|
| DP-10      | 1 | D10h | Decagon                          |
| EPY-10     | 2 | C9v  | Enneagonal pyramid               |
| OBPY-10    | 3 | D8h  | Octagonal bipyramid              |
| PPR-10     | 4 | D5h  | Pentagonal prism                 |
| PAPR-10    | 5 | D5d  | Pentagonal antiprism             |
| JBCCU-10   | 6 | D4h  | Bicapped cube J15                |
| JBCSAPR-10 | 7 | D4d  | Bicapped square antiprism J17    |
| JMBIC-10   | 8 | C2v  | Metabidiminished icosahedron J62 |

Structure 1 [Y]

|   |         |         |         |
|---|---------|---------|---------|
| O | 1.0104  | 10.4625 | 10.8672 |
| O | -1.0104 | 10.4625 | 12.3742 |
| O | -0.6868 | 8.1210  | 13.9895 |
| O | 0.6868  | 8.1210  | 9.2519  |
| O | 1.1408  | 9.2457  | 13.7417 |
| O | -1.1408 | 9.2457  | 9.4997  |
| N | -2.7143 | 8.3843  | 11.8782 |
| N | 2.7143  | 8.3843  | 11.3632 |
| N | 1.1486  | 6.5484  | 12.5569 |
| N | -1.1486 | 6.5484  | 10.6845 |
| N | -0.2787 | 8.7382  | 8.7188  |

DP-10 Ideal structure CShM = 31.44118

|   |     |         |        |         |
|---|-----|---------|--------|---------|
| O | M   | -0.0253 | 8.5693 | 11.3569 |
| O | L1  | -1.5108 | 8.9577 | 12.9343 |
| O | L2  | -0.2944 | 8.8179 | 13.5275 |
| O | L6  | 1.4601  | 8.1808 | 9.7795  |
| O | L3  | 1.0247  | 8.5830 | 13.2915 |
| O | L8  | -1.0754 | 8.5555 | 9.4222  |
| N | L10 | -2.1597 | 8.9492 | 11.7386 |
| N | L5  | 2.1090  | 8.1893 | 10.9752 |
| N | L4  | 1.9427  | 8.3429 | 12.3166 |
| N | L9  | -1.9934 | 8.7956 | 10.3971 |
| N | L7  | 0.2437  | 8.3206 | 9.1863  |

EPY-10 Ideal structure CShM = 20.93587

|   |     |         |        |         |
|---|-----|---------|--------|---------|
| O | M   | 0.0610  | 8.7671 | 11.3625 |
| O | L2  | -1.7461 | 9.5171 | 12.7084 |
| O | L3  | -0.5432 | 8.9655 | 13.6505 |
| O | L7  | 1.3440  | 8.2624 | 9.4290  |
| O | L4  | 0.9423  | 8.3211 | 13.5221 |
| O | L9  | -1.4480 | 9.4735 | 9.6704  |
| N | L10 | -2.1034 | 9.7177 | 11.1365 |
| N | L6  | 2.1741  | 7.8622 | 10.7667 |
| N | L5  | 2.0155  | 7.8854 | 12.3831 |
| N | L1  | -0.8883 | 6.5912 | 11.3006 |
| N | L8  | -0.0865 | 8.8987 | 8.9960  |

OBPY-10 Ideal structure CShM = 22.57064

|   |     |         |         |         |
|---|-----|---------|---------|---------|
| O | M   | -0.0253 | 8.5693  | 11.3569 |
| O | L2  | -0.2391 | 10.8230 | 11.9463 |
| O | L4  | 0.2783  | 8.0094  | 13.6079 |
| O | L7  | -0.0889 | 7.3715  | 9.3484  |
| O | L3  | 0.0383  | 9.7670  | 13.3653 |
| O | L9  | -0.3912 | 10.5588 | 10.1820 |
| N | L1  | -2.3350 | 8.2871  | 11.5983 |
| N | L10 | 2.2843  | 8.8514  | 11.1155 |
| N | L5  | 0.3405  | 6.5797  | 12.5318 |
| N | L6  | 0.1884  | 6.3155  | 10.7675 |
| N | L8  | -0.3290 | 9.1291  | 9.1059  |

PPR-10 Ideal structure CShM = 20.08621

|   |    |         |         |         |
|---|----|---------|---------|---------|
| O | M  | -0.0253 | 8.5693  | 11.3569 |
| O | L1 | -0.5743 | 10.8627 | 11.6517 |
| O | L7 | -0.5181 | 8.0920  | 13.6323 |

|   |     |         |        |         |
|---|-----|---------|--------|---------|
| O | L4  | 1.4127  | 8.3060 | 9.4832  |
| O | L2  | 1.0704  | 9.8103 | 13.0619 |
| O | L10 | -1.9512 | 8.2146 | 10.0103 |
| N | L6  | -2.1628 | 9.1444 | 12.2221 |
| N | L3  | 2.2985  | 8.2302 | 11.7217 |
| N | L8  | 0.7100  | 6.5119 | 12.2921 |
| N | L9  | -0.1757 | 6.5876 | 10.0536 |
| N | L5  | -0.3628 | 9.9329 | 9.4399  |

PAPR-10 Ideal structure CShM = 19.21535

|   |     |         |         |         |
|---|-----|---------|---------|---------|
| O | M   | -0.0253 | 8.5693  | 11.3569 |
| O | L1  | -1.0469 | 10.3785 | 12.5370 |
| O | L6  | -0.6135 | 8.1615  | 13.6367 |
| O | L9  | 0.9962  | 6.7600  | 10.1768 |
| O | L5  | 1.3105  | 9.6530  | 13.0154 |
| O | L2  | -1.5090 | 9.9607  | 10.1030 |
| N | L7  | -2.3560 | 8.3517  | 11.8367 |
| N | L4  | 2.3053  | 8.7868  | 10.8771 |
| N | L10 | 1.4583  | 7.1778  | 12.6108 |
| N | L8  | -1.3612 | 7.4855  | 9.6984  |
| N | L3  | 0.5628  | 8.9770  | 9.0771  |

JBCCU-10 Ideal structure CShM = 18.95343

|   |    |         |         |         |
|---|----|---------|---------|---------|
| O | M  | -0.0253 | 8.5693  | 11.3569 |
| O | L1 | 0.2860  | 10.5477 | 12.2559 |
| O | L3 | -0.9616 | 8.6266  | 13.3417 |
| O | L8 | 0.9109  | 8.5119  | 9.3721  |
| O | L9 | 1.4428  | 9.1029  | 13.9880 |
| O | L2 | -0.9303 | 10.1056 | 10.0762 |
| N | L4 | -2.1779 | 8.1846  | 11.1620 |



|   |     |         |        |         |
|---|-----|---------|--------|---------|
| N | L7  | 2.1272  | 8.9539 | 11.5518 |
| N | L5  | 0.8796  | 7.0329 | 12.6375 |
| N | L6  | -0.3367 | 6.5908 | 10.4578 |
| N | L10 | -1.4935 | 8.0357 | 8.7257  |

JBCSAPR-10 Ideal structure CShM = 19.69155

|   |     |         |         |         |
|---|-----|---------|---------|---------|
| O | M   | -0.0253 | 8.5693  | 11.3569 |
| O | L1  | -1.0515 | 10.4166 | 11.9587 |
| O | L3  | -0.8403 | 8.1487  | 13.3536 |
| O | L6  | 0.8174  | 7.5637  | 9.5944  |
| O | L2  | 1.3484  | 9.5586  | 12.7575 |
| O | L7  | -1.4269 | 9.0060  | 9.7221  |
| N | L9  | -2.9974 | 8.5909  | 11.8421 |
| N | L10 | 2.9468  | 8.5476  | 10.8717 |
| N | L4  | 1.2323  | 6.9576  | 12.1623 |
| N | L5  | -1.2157 | 6.7381  | 11.1169 |
| N | L8  | 0.9336  | 10.1648 | 10.1897 |

JMBIC-10 Ideal structure CShM = 15.01810

|   |     |         |         |         |
|---|-----|---------|---------|---------|
| O | M   | 0.1762  | 8.5960  | 11.2379 |
| O | L10 | -0.8803 | 10.4721 | 12.4344 |
| O | L3  | -0.9472 | 8.0550  | 13.3624 |
| O | L7  | 1.2995  | 9.1368  | 9.1136  |
| O | L8  | 1.2912  | 9.3563  | 13.2986 |
| O | L4  | -0.8752 | 10.3366 | 9.8479  |
| N | L9  | -2.2863 | 8.6610  | 11.2298 |
| N | L5  | 2.6384  | 8.5309  | 11.2462 |
| N | L6  | 1.2274  | 6.8555  | 12.6280 |
| N | L2  | -0.9835 | 6.4257  | 11.3495 |
| N | L1  | -0.9390 | 7.8358  | 9.1775  |

JATDI-10 Ideal structure CShM = 21.69634

|   |     |         |         |         |
|---|-----|---------|---------|---------|
| O | M   | 0.0197  | 8.5597  | 11.5683 |
| O | L7  | -0.5376 | 10.5736 | 12.1959 |
| O | L2  | -0.8708 | 8.7526  | 13.5508 |
| O | L5  | 0.9102  | 8.3669  | 9.5858  |
| O | L3  | 1.2600  | 9.4797  | 13.1097 |
| O | L9  | -0.7537 | 9.8859  | 10.0181 |
| N | L1  | -1.2928 | 6.9393  | 12.2101 |
| N | L4  | 2.1547  | 8.1159  | 11.4966 |
| N | L8  | 0.7932  | 7.2336  | 13.1185 |
| N | L6  | -1.2205 | 7.6398  | 10.0268 |
| N | L10 | -0.7411 | 8.7148  | 8.0453  |

---

### Er(III)LH<sub>6</sub>

Ideal structures ML8

|          |       |                                            |
|----------|-------|--------------------------------------------|
| OP-8     | 1 D8h | Octagon                                    |
| HPY-8    | 2 C7v | Heptagonal pyramid                         |
| HBPY-8   | 3 D6h | Hexagonal bipyramid                        |
| CU-8     | 4 Oh  | Cube                                       |
| SAPR-8   | 5 D4d | Square antiprism                           |
| TDD-8    | 6 D2d | Triangular dodecahedron                    |
| JGBF-8   | 7 D2d | Johnson gyrobifastigium J26                |
| JETBPY-8 | 8 D3h | Johnson elongated triangular bipyramid J14 |
| JBTPR-8  | 9 C2v | Biaugmented trigonal prism J50             |

---

Structure 1 [Er]

|    |        |        |        |
|----|--------|--------|--------|
| Er | 3.1015 | 6.0440 | 5.9832 |
|----|--------|--------|--------|

|   |        |        |        |
|---|--------|--------|--------|
| O | 3.7292 | 8.0262 | 5.3143 |
| O | 1.3616 | 7.4215 | 6.3876 |
| O | 1.5308 | 4.6189 | 7.0347 |
| O | 1.6238 | 5.7407 | 4.1554 |
| N | 3.8142 | 3.7611 | 5.4219 |
| N | 4.4297 | 5.8424 | 3.8028 |
| N | 2.8735 | 6.5561 | 8.5076 |
| N | 5.1564 | 5.9505 | 7.2452 |

OP-8     Ideal structure   CShM = 33.58538

|    |    |        |        |        |
|----|----|--------|--------|--------|
| Er | M  | 3.0690 | 5.9957 | 5.9836 |
| O  | L1 | 4.1833 | 7.3443 | 6.8617 |
| O  | L3 | 1.5323 | 6.5703 | 7.0513 |
| O  | L4 | 1.1944 | 5.4484 | 6.1177 |
| O  | L5 | 1.9546 | 4.6471 | 5.1055 |
| N  | L6 | 3.3676 | 4.6358 | 4.6078 |
| N  | L7 | 4.6057 | 5.4211 | 4.9159 |
| N  | L2 | 2.7703 | 7.3556 | 7.3595 |
| N  | L8 | 4.9435 | 6.5430 | 5.8496 |

HPY-8     Ideal structure   CShM = 22.84472

|    |    |        |        |        |
|----|----|--------|--------|--------|
| Er | M  | 2.9888 | 5.7751 | 6.0085 |
| O  | L1 | 3.7105 | 7.7608 | 5.7848 |
| O  | L2 | 1.0002 | 6.4654 | 5.7203 |
| O  | L3 | 1.5952 | 6.4457 | 7.4652 |
| O  | L8 | 1.9027 | 5.9653 | 4.1924 |
| N  | L6 | 4.8657 | 5.0198 | 5.3600 |
| N  | L7 | 3.6230 | 5.3219 | 4.0320 |
| N  | L4 | 3.2395 | 5.9210 | 8.1132 |
| N  | L5 | 4.6950 | 5.2864 | 7.1763 |

HBPY-8 Ideal structure CShM = 11.74275

|    |    |        |        |        |
|----|----|--------|--------|--------|
| Er | M  | 3.0690 | 5.9957 | 5.9836 |
| O  | L2 | 3.7275 | 7.8351 | 4.8547 |
| O  | L3 | 2.4044 | 8.0396 | 6.6711 |
| O  | L5 | 2.4105 | 4.1563 | 7.1126 |
| O  | L1 | 1.2411 | 5.8435 | 4.6694 |
| N  | L6 | 3.7335 | 3.9518 | 5.2962 |
| N  | L7 | 4.3920 | 5.7913 | 4.1672 |
| N  | L4 | 1.7459 | 6.2002 | 7.8001 |
| N  | L8 | 4.8969 | 6.1480 | 7.2979 |

CU-8 Ideal structure CShM = 7.05514

|    |    |        |        |        |
|----|----|--------|--------|--------|
| Er | M  | 3.0690 | 5.9957 | 5.9836 |
| O  | L1 | 4.3215 | 7.8310 | 5.3319 |
| O  | L2 | 1.7927 | 7.9161 | 6.1962 |
| O  | L7 | 1.8164 | 4.1604 | 6.6354 |
| O  | L3 | 1.1905 | 5.8267 | 4.6401 |
| N  | L8 | 4.3453 | 4.0753 | 5.7711 |
| N  | L4 | 3.7194 | 5.7416 | 3.7758 |
| N  | L6 | 2.4185 | 6.2498 | 8.1915 |
| N  | L5 | 4.9474 | 6.1647 | 7.3271 |

SAPR-8 Ideal structure CShM = 2.91230

|    |    |        |        |        |
|----|----|--------|--------|--------|
| Er | M  | 3.0690 | 5.9957 | 5.9836 |
| O  | L1 | 3.9314 | 8.1991 | 5.9377 |
| O  | L2 | 1.1727 | 7.4048 | 6.1232 |
| O  | L7 | 1.3961 | 4.6801 | 7.0189 |
| O  | L3 | 1.6508 | 5.3001 | 4.2213 |

|   |    |        |        |        |
|---|----|--------|--------|--------|
| N | L8 | 3.6849 | 3.7535 | 5.5429 |
| N | L4 | 4.4095 | 6.0944 | 4.0358 |
| N | L6 | 3.0088 | 6.7301 | 8.2327 |
| N | L5 | 5.2976 | 5.8035 | 6.7566 |

TDD-8 Ideal structure CShM = 2.25784

|    |    |        |        |        |
|----|----|--------|--------|--------|
| Er | M  | 3.0690 | 5.9957 | 5.9836 |
| O  | L2 | 3.8334 | 8.1843 | 5.4695 |
| O  | L6 | 1.2500 | 7.4577 | 6.4227 |
| O  | L8 | 1.2831 | 4.6279 | 6.7444 |
| O  | L5 | 1.5750 | 5.7700 | 4.1518 |
| N  | L4 | 3.8851 | 3.7658 | 5.9717 |
| N  | L1 | 4.4207 | 5.7908 | 4.0420 |
| N  | L7 | 2.9824 | 6.2627 | 8.3416 |
| N  | L3 | 5.3221 | 6.1064 | 6.7254 |

JGBF-8 Ideal structure CShM = 12.14615

|    |    |        |        |        |
|----|----|--------|--------|--------|
| Er | M  | 3.0690 | 5.9957 | 5.9836 |
| O  | L3 | 3.5099 | 7.4964 | 5.0181 |
| O  | L1 | 1.3910 | 7.9226 | 6.4626 |
| O  | L5 | 2.6280 | 4.4950 | 6.9492 |
| O  | L4 | 1.5445 | 5.7954 | 4.9762 |
| N  | L8 | 3.2225 | 3.8685 | 4.4973 |
| N  | L7 | 5.1878 | 5.5695 | 4.5391 |
| N  | L2 | 2.4745 | 6.6222 | 8.4356 |
| N  | L6 | 4.5934 | 6.1960 | 6.9911 |

JETBPY-8 Ideal structure CShM = 23.44598

|    |   |        |        |        |
|----|---|--------|--------|--------|
| Er | M | 3.0690 | 5.9957 | 5.9836 |
|----|---|--------|--------|--------|

|   |    |        |        |        |
|---|----|--------|--------|--------|
| O | L1 | 4.4778 | 6.5199 | 5.1476 |
| O | L4 | 1.6700 | 6.7581 | 6.6319 |
| O | L6 | 2.7330 | 4.8673 | 7.2375 |
| O | L3 | 2.3223 | 6.4418 | 4.4997 |
| N | L5 | 3.3853 | 4.5510 | 5.1053 |
| N | L7 | 3.9277 | 5.5794 | 3.1766 |
| N | L8 | 2.2102 | 6.4120 | 8.7907 |
| N | L2 | 3.8255 | 6.8361 | 7.2798 |

JBTPR-8 Ideal structure CShM = 2.94878

|    |    |        |        |        |
|----|----|--------|--------|--------|
| Er | M  | 3.1434 | 5.7960 | 6.2216 |
| O  | L1 | 3.5648 | 7.8661 | 5.5889 |
| O  | L7 | 0.8306 | 7.4904 | 6.4370 |
| O  | L4 | 1.3810 | 4.7084 | 6.9792 |
| O  | L2 | 1.9450 | 5.8098 | 4.3705 |
| N  | L6 | 3.6745 | 3.7855 | 5.4876 |
| N  | L8 | 4.7862 | 5.8987 | 3.8643 |
| N  | L3 | 3.0009 | 6.7646 | 8.1976 |
| N  | L5 | 5.2943 | 5.8418 | 6.7060 |
